# Supplementary material
Source: publisher figshare collection journal article supplement (https://acs.figshare.com/ndownloader/files/4465576)

## Supporting Information

### Sequential Reaction of Arynes *via* Insertion into the $\pi$ -Bond of Amides and Trapping Reaction with Dialkylzincs

Eito Yoshioka, Shigeru Kohtani, and Hideto Miyabe \*

*School of Pharmacy, Hyogo University of Health Sciences, Minatojima, Chuo-ku, Kobe 650-8530, Japan.*

*miyabe@huhs.ac.jp*

#### Table of contents

Results of calculation studies on possible intermediates **A-C**: S2.

Experimental procedure for reaction of aryne precursor **1** with DMF or DMA: S4.

Characterization data of obtained compounds **2-4**: S5.

General procedure for trapping reaction using dialkylzincs: S6.

Experimental procedure for trapping reaction using 1-formylpiperidine **7**: S6.

Characterization data of obtained compounds **5a-c**, **6**, **5a-d**, **8**, **10**, **12a**, **12b**, **14**, and **15**: S7.

Characterization data of compound **6** and corresponding alcohol **16**: S10.

**References**: S11.

<sup>1</sup>H and <sup>13</sup>C NMR of obtained compounds **2-4**, **5a-c**, **6**, **5a-d**, **8**, **10**, **12a**, **12b**, **14**, and **16**: S12.

### Results of Calculation Studies on Possible Intermediates A-C.

Calculation studies were performed on Hartree-Fock 6-311G\* by using Spartan'08 Essential Edition (WAVEFUNCTION, INC).

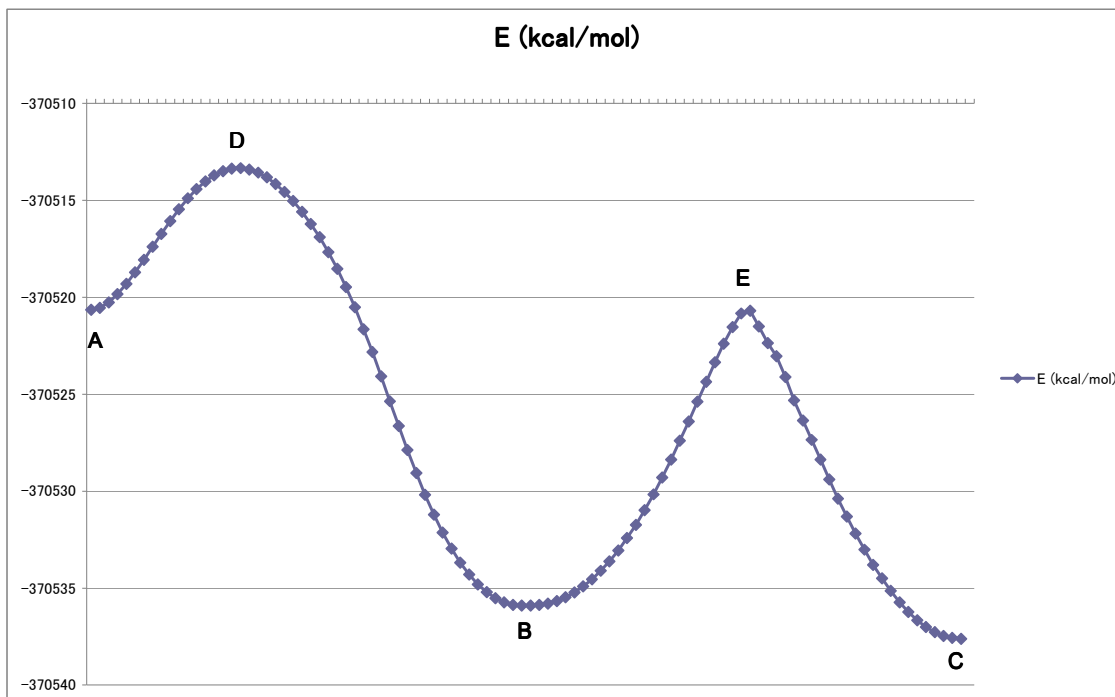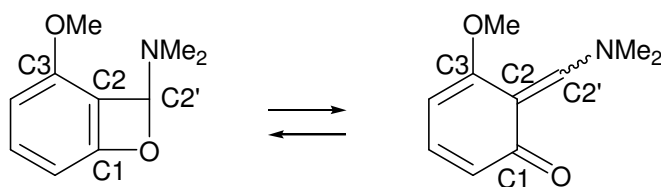

| System           | Bond Length<br>(C2' and O atom at C1) | Dihedral Angle<br>(C3-C2 and C2'-N) | Energy (au) |
|------------------|---------------------------------------|-------------------------------------|-------------|
| <b>A</b>         | 1.501 Å                               |                                     | -590.461743 |
| <b>B</b>         | 2.675 Å                               | -21.41°                             | -590.486051 |
| <b>C</b>         | 2.906 Å                               | -163.29°                            | -590.488774 |
| <b>D</b>         | 1.908 Å                               |                                     | -590.450099 |
| <b>E</b>         |                                       | -93.80°                             | -590.461818 |
| 3-Methoxybenzyne |                                       |                                     | -343.343682 |
| DMF              |                                       |                                     | -247.045380 |

The four-membered intermediate **A**

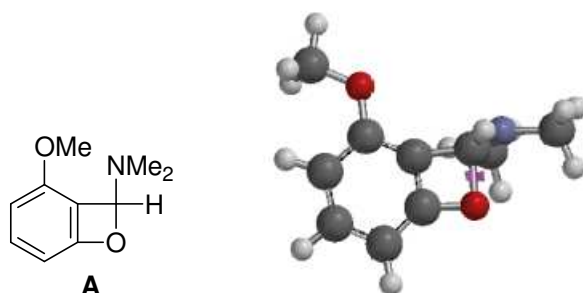

The quinone methide *E*-form **B**

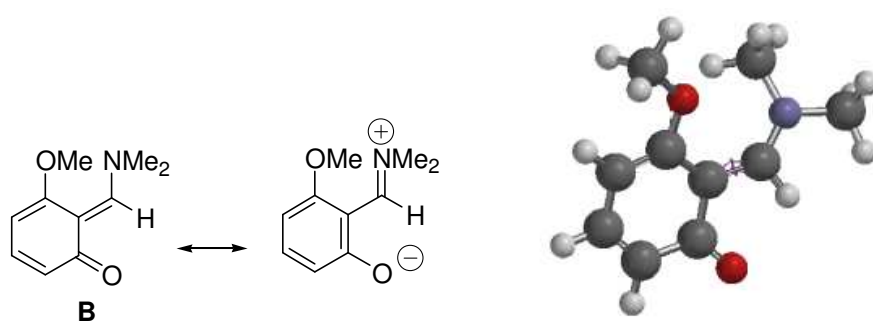

The quinone methide *Z*-form **C**

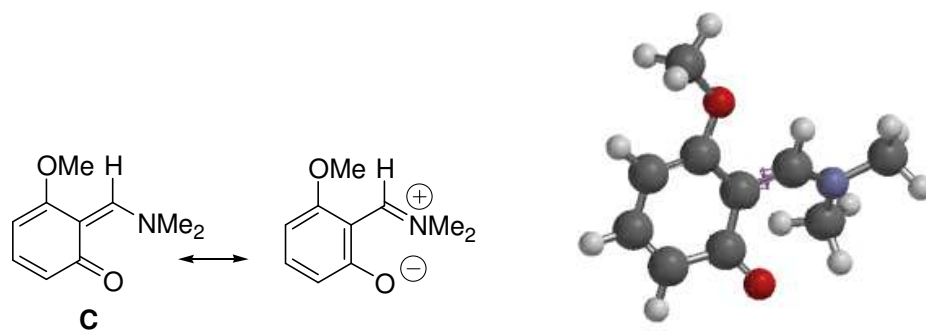

Transition state **D**

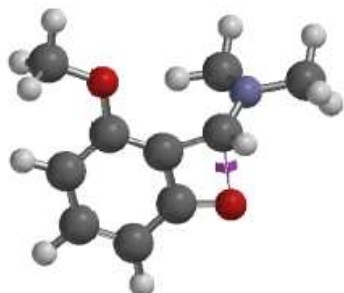

Transition state **E**

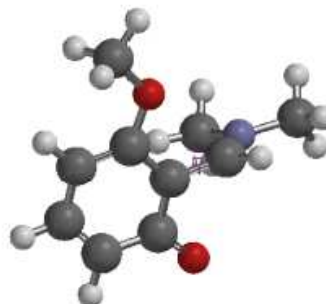

## Experimental Section

**General.** Melting points were taken on a BUCHI B-540 or Yanaco MP-J3 and are uncorrected. Infrared spectra were measured on a JASCO FT/IR-4100. <sup>1</sup>H-NMR spectra were measured on a JEOL ECX-400 PSK (400 MHz) or Varian NMRS 600 (600 MHz). <sup>13</sup>C-NMR spectra were measured on a JEOL ECX-400 PSK (101 MHz) or Varian NMRS 600 (126 MHz) with CDCl<sub>3</sub> or CD<sub>3</sub>OD as an internal standard (77.0 or 49.0 ppm, respectively). <sup>19</sup>F-NMR spectra were measured on a JEOL ECX-400 PSK (376 MHz) with C<sub>6</sub>F<sub>6</sub> as an internal standard (-162.2 ppm). Low and high resolution mass spectra (EI-MS, CI-MS, ESI-MS and HRMS) were obtained by use of a Hitachi M-4100 GC/MS spectrometer or Thermo Fisher Scientific Exactive LC/MS spectrometer. Elemental analyses were measured on Yanaco CHN CORDER MT-5. For silica gel column chromatography, SiliCycle Inc. SiliaFlash F60 was used. The anhydrous TBAF was prepared from TBAF·3H<sub>2</sub>O by heating the hydrate at 40 °C for 6 hours, at 60 °C for 12 hours, at 80 °C for 6 hours, and then at 120 °C for 12 hours under reduced pressure. The prepared anhydrous TBAF was used as a solution by addition of appropriate solvent such as DMF, CH<sub>3</sub>CN, and so on. Products **2**,<sup>1)</sup> **3**,<sup>2)</sup> **10**,<sup>3)</sup> **15**,<sup>4)</sup> and **16**<sup>5)</sup> are known compounds.

### 1. Experimental Procedure for Reaction of Aryne Precursor **1** with DMF (Table 1).

(1) For the reactions using the 3.0 or 10 equiv. of DMF, see: To a solution of 3-methoxy-2-(trimethylsilyl)phenyl triflate **1** (53 μL, 0.20 mmol) and DMF (0.60 mmol or 2.0 mmol) in CH<sub>3</sub>CN, THF, CH<sub>2</sub>Cl<sub>2</sub>, or CH<sub>3</sub>OH (1.4 mL) was added TBAF (1.0 M solution in corresponding solvent, 0.60 mL, 0.60 mmol) under argon atmosphere at room temperature. After stirring at the same temperature for 3 hours, H<sub>2</sub>O (0.1 mL) was added to the reaction mixture. The reaction mixture was concentrated under reduced pressure. Purification of the residue by flash silica gel column chromatography (AcOEt:hexane =1:20–1:8 with 2% CH<sub>2</sub>Cl<sub>2</sub>) afforded the product **2**.

(2) For the reactions using DMF as a solvent, see: To a solution of TBAF, CsF, TBAHF<sub>2</sub>, or TBAT (0.60 mmol) in DMF (1.2 mL) was added a solution of 3-methoxy-2-(trimethylsilyl)phenyl triflate **1** (53 μL, 0.20 mmol) in DMF (0.8 mL) under argon atmosphere at room temperature. After stirring at the same temperature for 3 hours, H<sub>2</sub>O (0.1 mL) was added to the reaction mixture. The reaction mixture was concentrated under reduced pressure. Purification of the residue by flash silica gel column chromatography (AcOEt:hexane =1:20–1:8 with 2% CH<sub>2</sub>Cl<sub>2</sub>) afforded the product **2**.

## 2. Reaction of Aryne Precursor 1 with DMA (Scheme 1).

To a solution of TBAF (157 mg, 0.60 mmol) in DMA (1.2 mL) was added a solution of 3-methoxy-2-(trimethylsilyl)phenyl triflate **1** (53  $\mu$ L, 0.20 mmol) in DMA (0.8 mL) under argon atmosphere at room temperature. After stirring at the same temperature for 3 hours, H<sub>2</sub>O (0.1 mL) was added to the reaction mixture. The reaction mixture was concentrated under reduced pressure. Purification of the residue by flash silica gel column chromatography (AcOEt:hexane =1:20–1:8 with 2% CH<sub>2</sub>Cl<sub>2</sub>) afforded the products **2** (11.3 mg, 34%) and **4** (3.8 mg, 10%).

## 3. Characterization Data of Obtained Compounds 2-4:

Aldehyde (**2**)<sup>1)</sup>

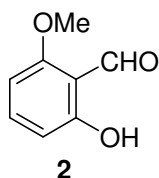

Colorless crystals. mp 73.5-74.5 °C (AcOEt-hexane). IR (CHCl<sub>3</sub>) 1646 cm<sup>-1</sup>. <sup>1</sup>H NMR (CDCl<sub>3</sub>)  $\delta$  11.97 (1H, s), 10.34 (1H, s), 7.41 (1H, dd,  $J$  = 8.0, 8.5 Hz), 6.52 (1H, d,  $J$  = 8.5 Hz), 6.38 (1H, d,  $J$  = 8.0 Hz), 3.89 (3H, s); <sup>13</sup>C NMR (CDCl<sub>3</sub>)  $\delta$  194.5, 163.6, 162.5, 138.4, 110.8, 109.9, 101.0, 55.8; MS (EI<sup>+</sup>)  $m/z$  84 (100), 153 (M+H<sup>+</sup>, 9); HRMS (EI<sup>+</sup>) calcd for C<sub>8</sub>H<sub>9</sub>O<sub>3</sub> (M+H<sup>+</sup>): 153.0552. Found: 153.0553; Elemental analysis (%) calcd for C<sub>8</sub>H<sub>8</sub>O<sub>3</sub>: C, 63.15; H, 5.30; O, 31.55, found: C, 63.14, H, 5.32.

Ketone (**3**)<sup>2)</sup>

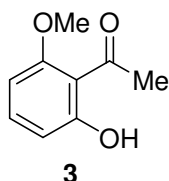

Colorless crystals. mp 57-57.5 °C (AcOEt-hexane). IR (CHCl<sub>3</sub>) 1623 cm<sup>-1</sup>. <sup>1</sup>H NMR (CDCl<sub>3</sub>)  $\delta$  13.23 (1H, s), 7.33 (1H, t,  $J$  = 8.0 Hz), 6.56 (1H, dd,  $J$  = 8.0, 1.0 Hz), 6.39 (1H, dd,  $J$  = 8.0, 1.0 Hz), 3.90 (3H, s), 2.67 (3H, s); <sup>13</sup>C NMR (CDCl<sub>3</sub>)  $\delta$  205.1, 164.6, 161.5, 136.0, 111.3, 110.7, 101.1, 55.6, 33.7; MS (EI<sup>+</sup>)  $m/z$  83 (100), 166 (M<sup>+</sup>, 3); HRMS (EI<sup>+</sup>) calcd for C<sub>9</sub>H<sub>10</sub>O<sub>3</sub> (M<sup>+</sup>): 166.0630. Found: 166.0646.

Ketone (**4**)

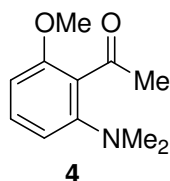

Colorless oil. IR (CHCl<sub>3</sub>) 1702 cm<sup>-1</sup>. <sup>1</sup>H NMR (CDCl<sub>3</sub>) δ 7.23 (1H, br t, *J* = 8.0 Hz), 6.67 (1H, br d, *J* = 8.0 Hz), 6.56 (1H, br d, *J* = 8.0 Hz), 3.78 (3H, s), 2.72 (6H, s), 2.50 (3H, s); <sup>13</sup>C NMR (CDCl<sub>3</sub>) δ 205.2, 156.2, 151.8, 130.2, 125.3, 111.0, 104.7, 55.8, 44.8, 31.8; MS (EI<sup>+</sup>) *m/z* 83 (100), 193 (M<sup>+</sup>, 0.4); HRMS (EI<sup>+</sup>) calcd for C<sub>11</sub>H<sub>15</sub>NO<sub>2</sub> (M<sup>+</sup>): 193.1103. Found: 193.1121.

#### 4. General Procedure for Trapping Reaction Using Dialkylzincs.

To a suspension of CsF (91 mg, 0.60 mmol) in DMF (1.2 mL) was added a solution of aryne precursor **1**, **9**, **11**, or **13** (0.20 mmol) in DMF (0.8 mL) under argon atmosphere at room temperature. After stirring at the same temperature for 15 minutes, Et<sub>2</sub>Zn (1.05 M in hexane, 0.95 mL, 1.0 mmol), Me<sub>2</sub>Zn (1.0 M in hexane, 1.0 mL, 1.0 mmol), or Ph<sub>2</sub>Zn (220 mg, 1.0 mmol) was added to the reaction mixture at room temperature. After stirring at the same temperature for 12 hours, H<sub>2</sub>O (0.1 mL) was added to the reaction mixture. The reaction mixture was concentrated under reduced pressure. Purification of the residue by flash silica gel column chromatography (AcOEt:hexane =1:20–1:0 with 2% CH<sub>2</sub>Cl<sub>2</sub>) afforded the products **5a-c**, **5a-d**, **10**, **12a**, **12b**, **14**, and **15**.

#### 5. Experimental Procedure for Trapping Reaction Using 1-Formylpiperidine **7**.

To a solution of TBAF (157 mg, 0.60 mmol) and 1-formylpiperidine **7** in CH<sub>3</sub>CN (1.2 mL) was added a solution of 3-methoxy-2-(trimethylsilyl)phenyl triflate **1** (53 μL, 0.20 mmol) in CH<sub>3</sub>CN (0.8 mL) under argon atmosphere at room temperature. After stirring at the same temperature for 15 minutes, Et<sub>2</sub>Zn (1.05 M in hexane, 0.95 mL, 1.0 mmol) was added to the reaction mixture. After stirring at the same temperature for 12 hours, H<sub>2</sub>O (0.1 mL) was added to the reaction mixture. The reaction mixture was concentrated under reduced pressure. Purification of the residue by flash silica gel column chromatography (AcOEt:hexane =1:20–1:0 with 2% CH<sub>2</sub>Cl<sub>2</sub>) afforded the product **8** (20.1 mg, 40%).

## 6. Characterization Data of Obtained Compounds 5a-c, 5a-d, 8, 10, 12a, 12b, 14, and 15.

### Ethylated Product (**5a**)

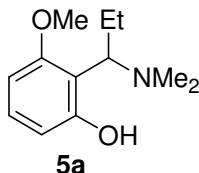

Colorless oil.  $^1\text{H}$  NMR ( $\text{CDCl}_3$ )  $\delta$  7.06 (1H, t,  $J = 8.0$  Hz), 6.44 (1H, dd,  $J = 8.0, 1.0$  Hz), 6.35 (1H, dd,  $J = 8.0, 1.0$  Hz), 3.76 (3H, s), 3.74 (1H, m), 2.33 (6H, s), 1.88-1.72 (2H, m), 0.76 (3H, t,  $J = 7.5$  Hz); The exchangeable proton peak of OH group was not clearly detected.  $^{13}\text{C}$  NMR ( $\text{CDCl}_3$ )  $\delta$  158.7, 157.9, 128.1, 113.7, 109.6, 101.1, 64.4, 55.3, 43.3 (br s), 24.9, 9.5; MS ( $\text{EI}^+$ )  $m/z$  153 (100), 209 ( $\text{M}^+$ , 13); HRMS ( $\text{EI}^+$ ) calcd for  $\text{C}_{12}\text{H}_{19}\text{NO}_2$  ( $\text{M}^+$ ): 209.1416. Found: 209.1421.

### Methylated Product (**5b**)

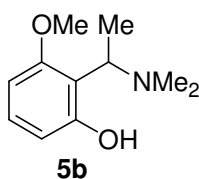

Colorless oil.  $^1\text{H}$  NMR ( $\text{CDCl}_3$ )  $\delta$  7.04 (1H, t,  $J = 8.0$  Hz), 6.44 (1H, dd,  $J = 8.0, 1.0$  Hz), 6.34 (1H, dd,  $J = 8.0, 1.0$  Hz), 3.84 (1H, t,  $J = 6.5$  Hz), 3.78 (3H, s), 2.33 (6H, br s), 1.33 (3H, d,  $J = 6.5$  Hz); The exchangeable proton peak of OH group was not clearly detected.  $^{13}\text{C}$  NMR ( $\text{CDCl}_3$ )  $\delta$  158.3, 157.0, 128.0, 116.1, 109.7, 101.2, 59.4, 55.5, 43.4 (br s), 18.7; MS ( $\text{EI}^+$ )  $m/z$  180 (100), 195 ( $\text{M}^+$ , 51); HRMS ( $\text{EI}^+$ ) calcd for  $\text{C}_{11}\text{H}_{17}\text{NO}_2$  ( $\text{M}^+$ ): 195.1259. Found: 195.1275.

### Phenylated Product (**5c**)

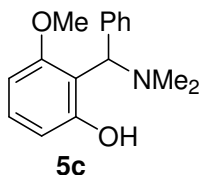

Colorless crystals. mp 150-151  $^\circ\text{C}$  (AcOEt-hexane).  $^1\text{H}$  NMR ( $\text{CDCl}_3$ )  $\delta$  7.48 (2H, br d,  $J = 7.0$  Hz), 7.27-7.17 (3H, m), 7.03 (1H, t,  $J = 8.0$  Hz), 6.49 (1H, dd,  $J = 8.0, 1.0$  Hz), 6.26 (1H, dd,  $J = 8.0, 1.0$  Hz), 4.69 (1H, s), 3.70 (3H, s), 2.27 (6H, br s); The exchangeable proton peak of OH group was not clearly detected.  $^{13}\text{C}$  NMR ( $\text{CDCl}_3$ )  $\delta$  157.9, 157.4, 141.2, 128.4 (2C), 127.4, 114.8, 109.9, 101.5, 70.2, 55.5, 44.2 (br s); One carbon peak was missing due to overlapping. MS ( $\text{EI}^+$ )  $m/z$  211 (100), 257 ( $\text{M}^+$ , 37); HRMS ( $\text{EI}^+$ ) calcd for  $\text{C}_{16}\text{H}_{19}\text{NO}_2$  ( $\text{M}^+$ ): 257.1416. Found:

257.1431; Elemental analysis (%) calcd for C<sub>16</sub>H<sub>19</sub>NO<sub>2</sub>: C, 74.68; H, 7.44; N, 5.44; O, 12.44, found: C, 74.68, H, 7.44, N, 5.44.

Deuterated Product (**5a-d**)

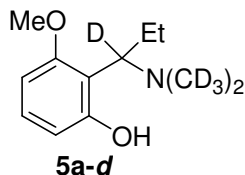

Colorless oil. <sup>1</sup>H NMR (CDCl<sub>3</sub>) δ 7.07 (1H, t, *J* = 8.0 Hz), 6.45 (1H, br d, *J* = 8.0 Hz), 6.35 (1H, br d, *J* = 8.0 Hz), 3.76 (3H, s), 1.88-1.78 (2H, m), 0.76 (3H, t, *J* = 7.5 Hz); The exchangeable proton peak of OH group was not clearly detected. <sup>13</sup>C NMR (CDCl<sub>3</sub>) δ 158.8, 158.0, 128.1, 113.6, 109.6, 101.2, 63.9 (t, *J* = 18 Hz), 55.3, 24.8, 9.5; One carbon peak of N(CD<sub>3</sub>)<sub>2</sub> group was not clearly detected due to the presence of rotamer and D-C coupling. MS (EI<sup>+</sup>) *m/z* 187 (100), 216 (M<sup>+</sup>, 16); HRMS (EI<sup>+</sup>) calcd for C<sub>12</sub>H<sub>12</sub>D<sub>7</sub>NO<sub>2</sub> (M<sup>+</sup>): 216.1848. Found: 216.1856.

Piperidine derivative (**8**)

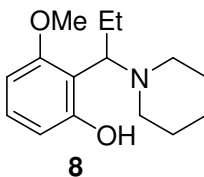

Colorless oil. <sup>1</sup>H NMR (CD<sub>3</sub>OD) δ 7.02 (1H, t, *J* = 8.0 Hz), 6.40 (1H, br dd, *J* = 8.0, 1.0 Hz), 6.32 (1H, br dd, *J* = 8.0, 1.0 Hz), 3.92 (1H, dd, *J* = 8.0, 4.0 Hz), 3.74 (3H, s), 2.65-2.45 (4H, br m), 1.89-1.52 (8H, m), 0.74 (3H, t, *J* = 7.5 Hz); The exchangeable proton peak of OH group was not clearly detected. <sup>13</sup>C NMR (CD<sub>3</sub>OD) δ 160.0, 159.7, 129.4, 114.5, 110.5, 102.4, 64.6, 55.8, 52.8 (br s), 27.1, 25.2, 24.9, 9.8; MS (EI<sup>+</sup>) *m/z* 83 (100), 249 (M<sup>+</sup>, 0.1); HRMS (EI<sup>+</sup>) calcd for C<sub>15</sub>H<sub>23</sub>NO<sub>2</sub> (M<sup>+</sup>): 249.1729. Found: 249.1738.

Adduct (**10**)<sup>3)</sup>

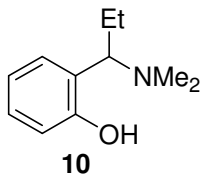

Colorless oil. <sup>1</sup>H NMR (CDCl<sub>3</sub>) δ 7.18 (1H, dt, *J* = 8.0, 2.0 Hz), 6.96 (1H, dd, *J* = 7.5, 2.0 Hz), 6.87 (1H, dd, *J* = 8.0, 1.0 Hz), 6.81 (1H, dt, *J* = 7.5, 1.0 Hz), 3.43 (1H, br dd, *J* = 9.5, 4.0 Hz), 2.47 (6H, s), 2.09-1.83 (2H, m), 0.79 (3H, t, *J* = 7.5 Hz); The exchangeable proton peak of OH group was not clearly detected. <sup>13</sup>C NMR (CDCl<sub>3</sub>) δ 156.5, 129.2, 129.1, 123.3, 119.1, 116.7,



71.7, 42.6, 23.5, 10.8; MS (EI<sup>+</sup>)  $m/z$  84 (100), 179 (M<sup>+</sup>, 0.1); HRMS (EI<sup>+</sup>) calcd for C<sub>11</sub>H<sub>17</sub>NO (M<sup>+</sup>): 179.1310. Found: 179.1329.

Isomer (**12a**)

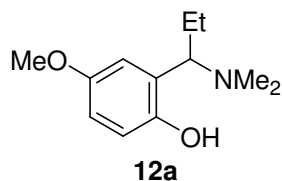

Colorless oil. <sup>1</sup>H NMR (CDCl<sub>3</sub>) δ 6.75-6.68 (2H, m), 6.49 (1H, d,  $J$  = 3.0 Hz), 3.74 (3H, s), 3.05 (1H, dd,  $J$  = 9.5, 4.0 Hz), 2.33 (6H, s), 1.94-1.84 (1H, m), 1.81-1.69 (1H, m), 0.78 (3H, t,  $J$  = 7.5 Hz); The exchangeable proton peak of OH group was not clearly detected. <sup>13</sup>C NMR (CDCl<sub>3</sub>) δ 152.0, 150.8, 126.2, 116.6, 115.3, 112.7, 72.7, 55.7, 43.1, 24.4, 10.9; MS (EI<sup>+</sup>)  $m/z$  84 (100), 209 (M<sup>+</sup>, 8); HRMS (EI<sup>+</sup>) calcd for C<sub>12</sub>H<sub>19</sub>NO<sub>2</sub> (M<sup>+</sup>): 209.1416. Found: 209.1431.

Isomer (**12b**)

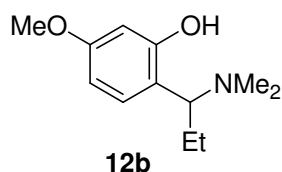

Colorless oil. <sup>1</sup>H NMR (CDCl<sub>3</sub>) δ 6.88 (1H, d,  $J$  = 9.0 Hz), 6.81 (1H, dd,  $J$  = 9.0, 3.0 Hz), 6.62 (1H, d,  $J$  = 3.0 Hz), 3.77 (3H, s), 3.74 (1H, m), 2.62 (6H, s), 2.01 (2H, m), 0.84 (3H, t,  $J$  = 7.5 Hz); The exchangeable proton peak of OH group was not clearly detected. <sup>13</sup>C NMR (CDCl<sub>3</sub>) δ 153.1, 149.4, 121.8, 117.7, 115.0, 114.7, 70.4, 55.8, 42.1, 22.3, 10.8; MS (ESI<sup>+</sup>)  $m/z$  210 (M+H<sup>+</sup>); HRMS (ESI<sup>+</sup>) calcd for C<sub>12</sub>H<sub>19</sub>NO<sub>2</sub> (M+H<sup>+</sup>): 210.1494. Found: 210.1491.

Adduct (**14**)

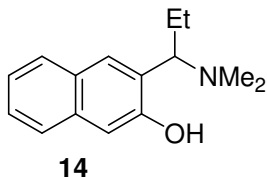

Yellow solid. mp 85-86 °C (CH<sub>2</sub>Cl<sub>2</sub>-hexane). Sublimation (ca.80 °C). <sup>1</sup>H NMR (CDCl<sub>3</sub>) δ 7.67 (2H, br d,  $J$  = 8.5 Hz), 7.34-7.39 (2H, m), 7.26 (1H, m), 7.16 (1H, br s), 3.28 (1H, dd,  $J$  = 10.0, 4.0 Hz), 2.38 (6H, s), 2.05-1.95 (1H, m), 1.87-1.76 (1H, m), 0.77 (3H, t,  $J$  = 7.5 Hz); The exchangeable proton peak of OH group was not clearly detected. <sup>13</sup>C NMR (CDCl<sub>3</sub>) δ 155.4, 134.2, 128.2, 128.0, 127.6, 127.3, 126.0, 125.8, 122.9, 110.5, 73.2, 43.2, 24.3, 11.2; MS (EI<sup>+</sup>)  $m/z$  200 (100), 229 (M<sup>+</sup>, 21); HRMS (EI<sup>+</sup>) calcd for C<sub>15</sub>H<sub>19</sub>NO (M<sup>+</sup>): 229.1467. Found: 229.1454.

Rearrangement product (**15**)<sup>4)</sup>

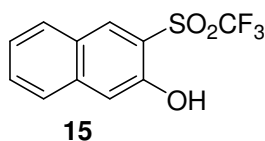

Yellow crystals. mp 120-121 °C (benzene-hexane). Sublimation (ca.102 °C). <sup>1</sup>H NMR (CDCl<sub>3</sub>) δ 8.44 (1H, s), 7.96 (1H, s, offset by D<sub>2</sub>O), 7.89 (1H, d, *J* = 8.0 Hz), 7.76 (1H, d, *J* = 8.0 Hz), 7.64 (1H, ddd, *J* = 1.5, 1.5, 7.5 Hz), 7.46 (2H, m); <sup>13</sup>C NMR (CDCl<sub>3</sub>) δ 151.8, 139.5, 135.7, 131.5, 129.6, 127.3, 126.7, 125.8, 119.8 (q, *J* = 327 Hz), 115.1, 114.6; <sup>19</sup>F NMR (CDCl<sub>3</sub>) δ -79.3; MS (EI<sup>+</sup>) *m/z* 115 (100), 276 (M<sup>+</sup>, 87); HRMS (EI<sup>+</sup>) calcd for C<sub>11</sub>H<sub>7</sub>F<sub>3</sub>O<sub>3</sub>S (M<sup>+</sup>): 276.0068. Found: 276.0068.

## 6. Characterization Data of Compound 6 and Corresponding Alcohol 16

The unstable adduct **6** was easily hydrolyzed into the corresponding alcohol **16** during purification by column chromatography. Thus, the structure of unstable adduct **6** was confirmed by <sup>1</sup>H NMR and low resolution mass. The characterization of alcohol **16** also supported the formation of **6**.

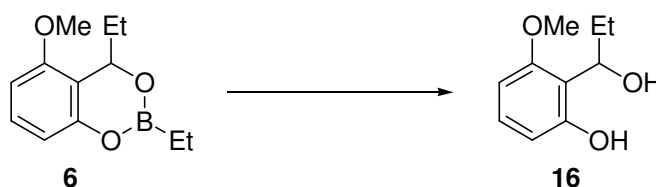

Adduct (**6**)

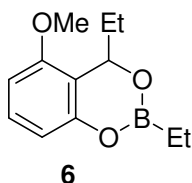

Colorless oil. <sup>1</sup>H NMR (CDCl<sub>3</sub>) δ 7.13 (1H, t, *J* = 8.0 Hz), 6.56 (2H, br t, *J* = 8.0 Hz), 5.19 (1H, dd, *J* = 6.5, 3.5 Hz), 3.80 (3H, s), 1.90-1.67 (2H, m), 1.03-0.86 (8H, m); MS (EI<sup>+</sup>) *m/z* 191 (100), 220 (M<sup>+</sup>, 14).

Alcohol (**16**)<sup>5)</sup>

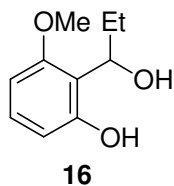

Colorless oil. <sup>1</sup>H NMR (CDCl<sub>3</sub>) δ 8.59 (1H, s), 7.09 (1H, t, *J* = 8.0 Hz), 6.51 (1H, d, *J* = 8.0 Hz), 6.39 (1H, d, *J* = 8.0 Hz), 5.32 (1H, t, *J* = 6.5 Hz), 3.77 (3H, s), 2.49 (1H, br s), 1.92-1.75 (2H, m), 0.99 (3H, t, *J* = 7.5 Hz); <sup>13</sup>C NMR (CDCl<sub>3</sub>) δ 157.1, 156.6, 128.7, 115.4, 110.2, 101.9, 71.8, 55.5, 29.3, 10.0; MS (EI<sup>+</sup>) *m/z* 153 (100), 182 (M<sup>+</sup>, 54); HRMS (EI<sup>+</sup>) calcd for C<sub>10</sub>H<sub>14</sub>O<sub>3</sub> (M<sup>+</sup>): 182.0943. Found: 182.0962.

## References

- 1) Haight, A. R.; Bailey, A. E.; Baker, W. S.; Cain, M. H.; Copp, R. R.; DeMattei, J. A.; Ford, K. L.; Henry, R. F.; Hsu, M. C.; Keyes, R. F.; King, S. A.; McLaughlin, M. A.; Melcher, L. M.; Nadler, W. R.; Oliver, P. A.; Parekh, S. I.; Patel, H. H.; Seif, L. S.; Staeger, M. A.; Wayne, G. S.; Wittenberger, S. J.; Zhang, W. *Org. Proc. Res. Dev.* **2004**, 8, 897-902.
- 2) Lau, C. K.; Belanger, Patrice C.; Dufresne, C.; Scheigetz, J. *J. Org. Chem.* **1987**, 52, 1670-1673.
- 3) Davies, R. E.; Haworth, R. D.; Jones, B.; Lamberton, A.. H. *J. Chem. Soc.* **1947**, 191-196.
- 4) Dyke, A. M.; Gill, D. M.; Harvey, J. N.; Hester, A. J.; Lloyd-Jones, G. C.; Muñoz, M. P.; Shepperson, I. R. *Angew. Chem. Int. Ed.* **2008**, 47, 5067-5070.
- 5) Revenko, Y. M.; Shamshurin, A. A. *Izv. Akad. Nauk Mold. SSR., Ser. Khim. Biol. Nauk* **1965**, 58-61.

$^1\text{H}$  NMR ( $\text{CDCl}_3$ ) of **2**

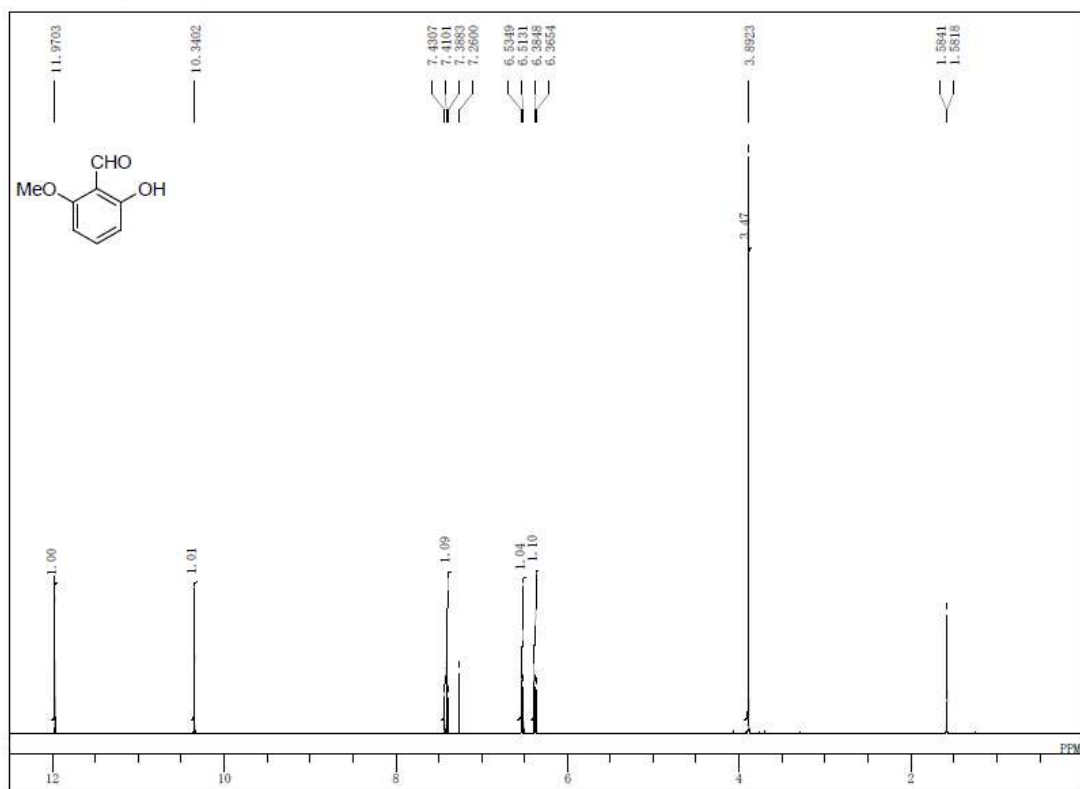

$^{13}\text{C}$  NMR ( $\text{CDCl}_3$ ) of **2**

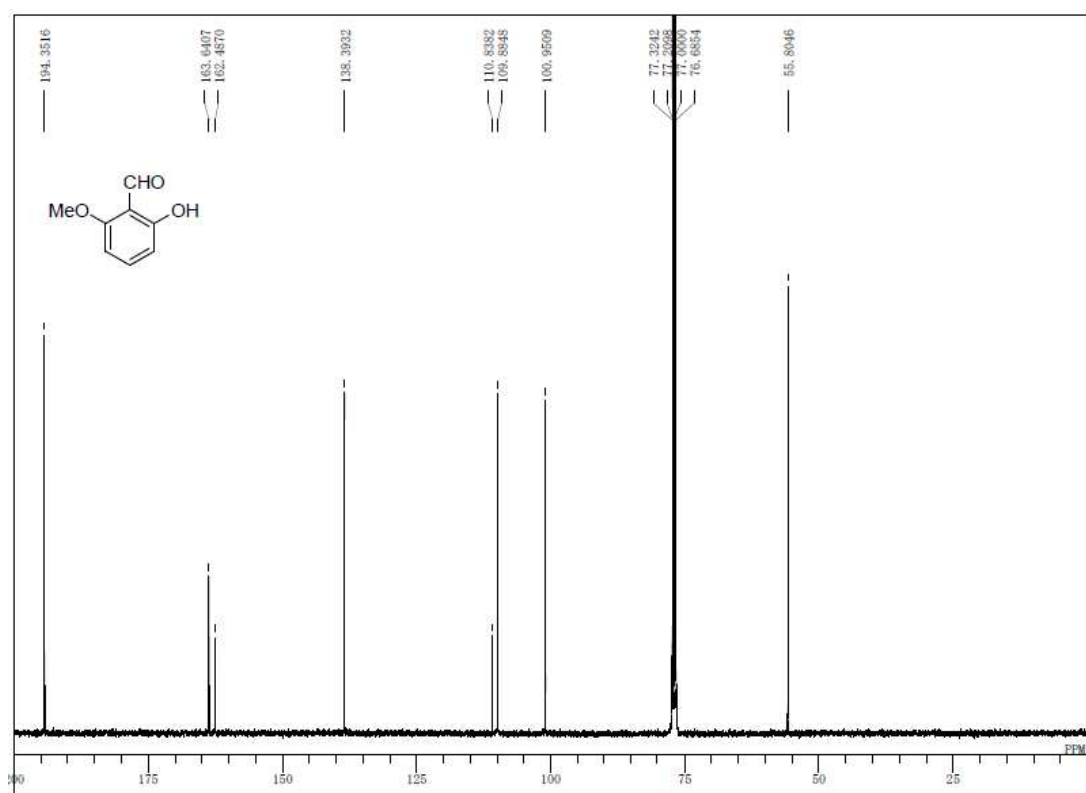

$^1\text{H}$  NMR ( $\text{CDCl}_3$ ) of **3**

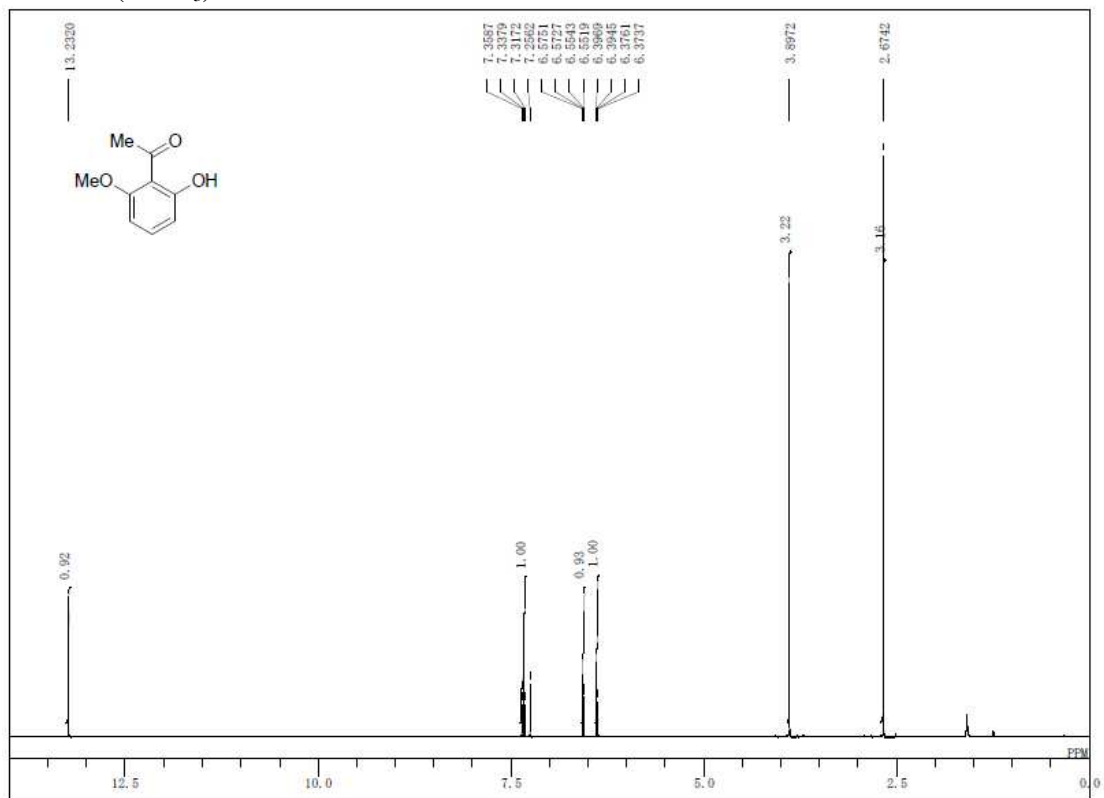

$^{13}\text{C}$  NMR ( $\text{CDCl}_3$ ) of **3**

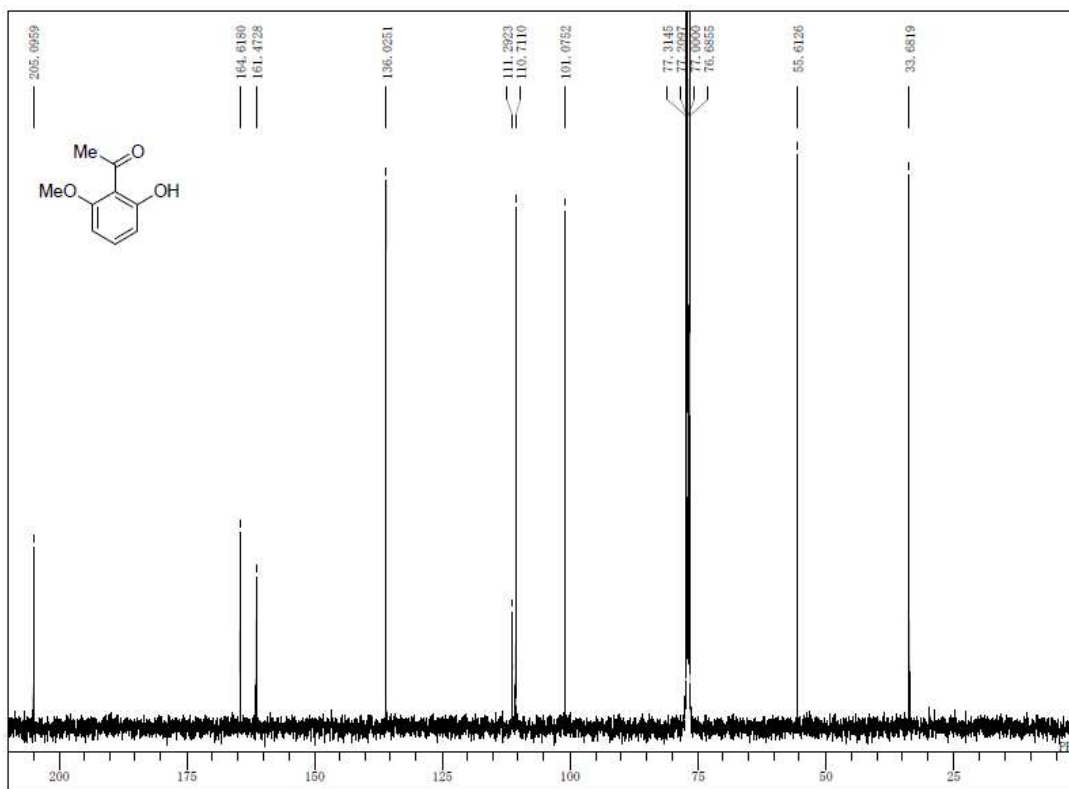

$^1\text{H}$  NMR ( $\text{CDCl}_3$ ) of **4**

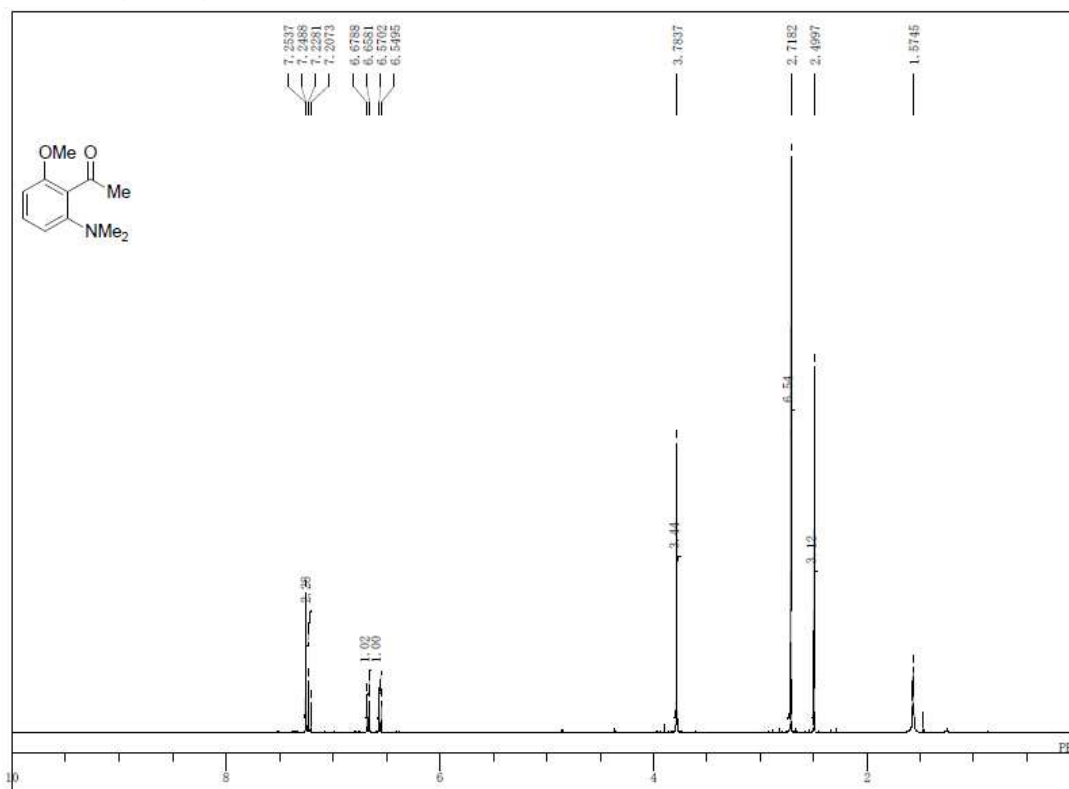

$^{13}\text{C}$  NMR ( $\text{CDCl}_3$ ) of **4**

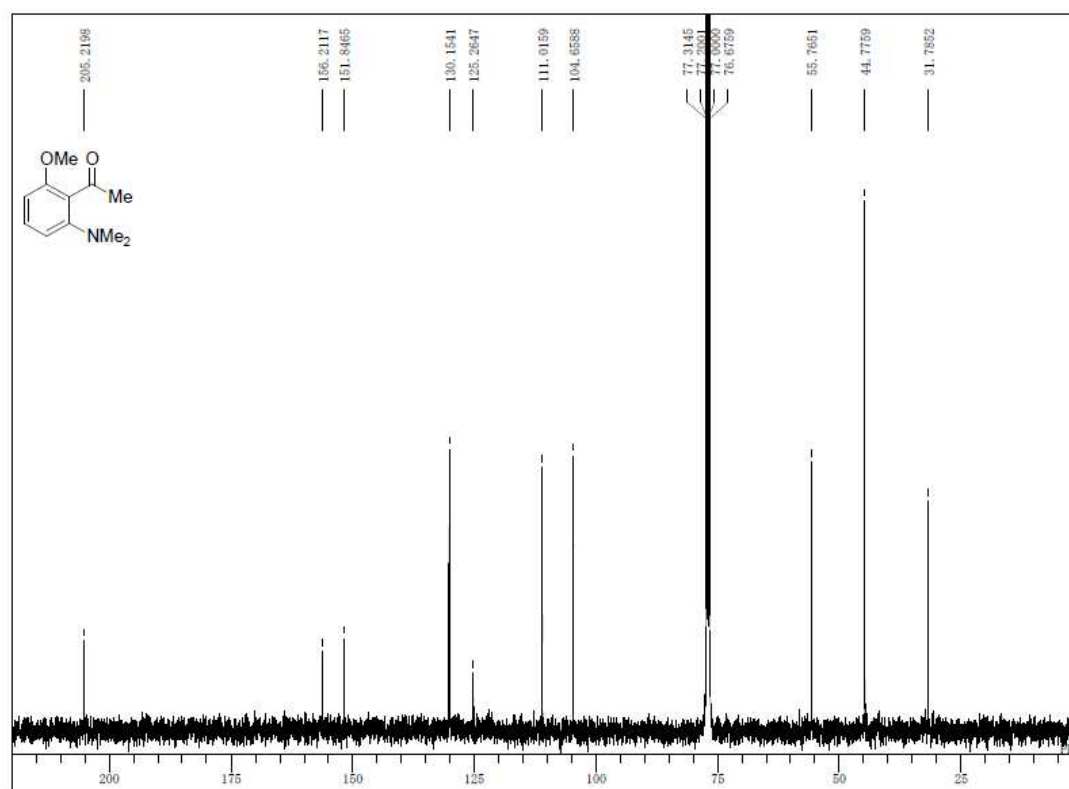

$^1\text{H}$  NMR ( $\text{CDCl}_3$ ) of **5a**

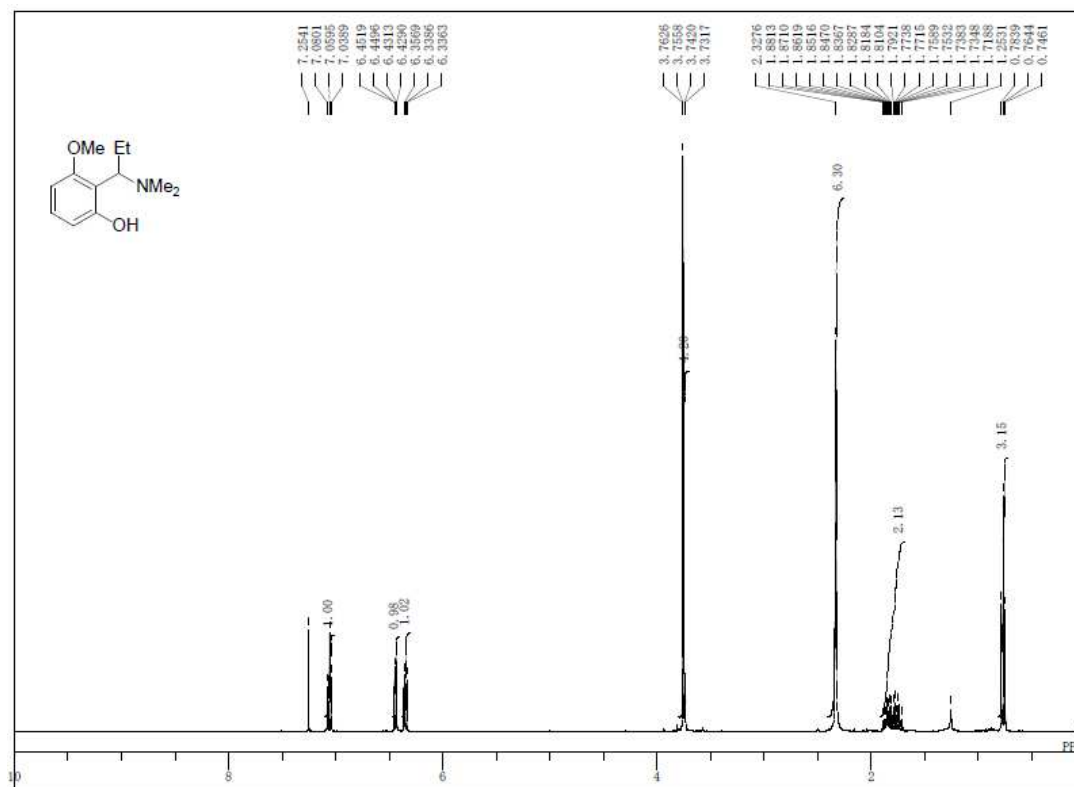

$^{13}\text{C}$  NMR ( $\text{CDCl}_3$ ) of **5a**

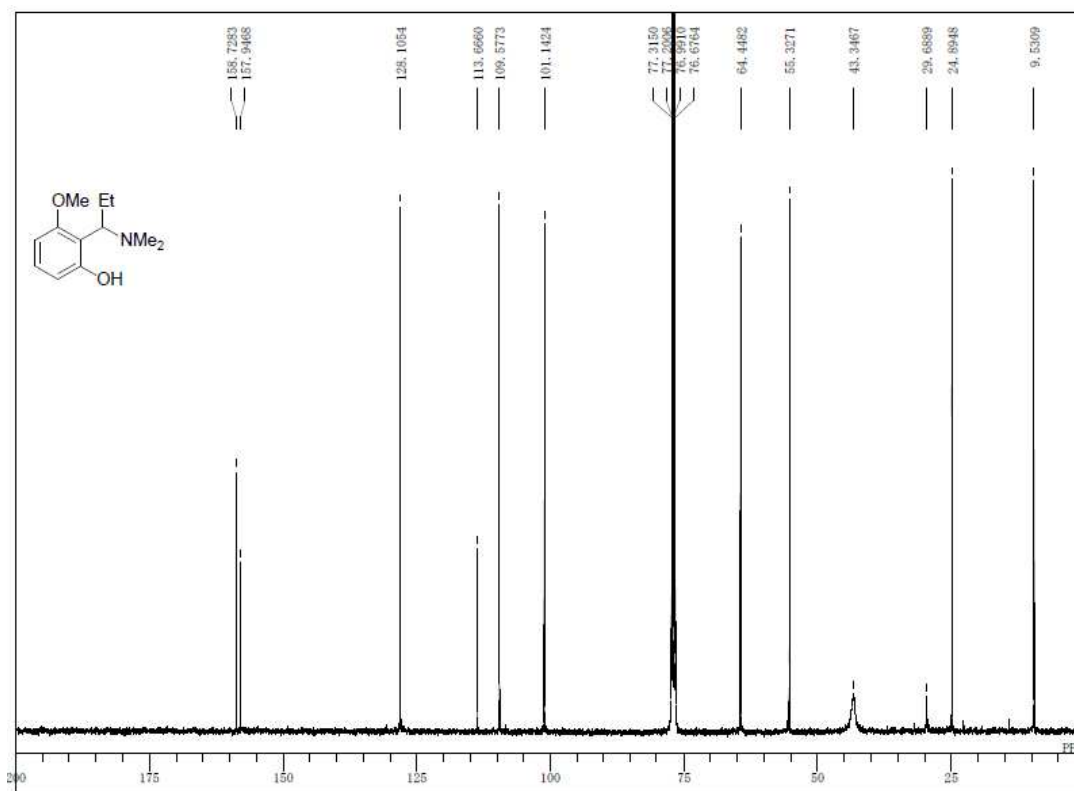

$^1\text{H}$  NMR ( $\text{CDCl}_3$ ) of **5b**

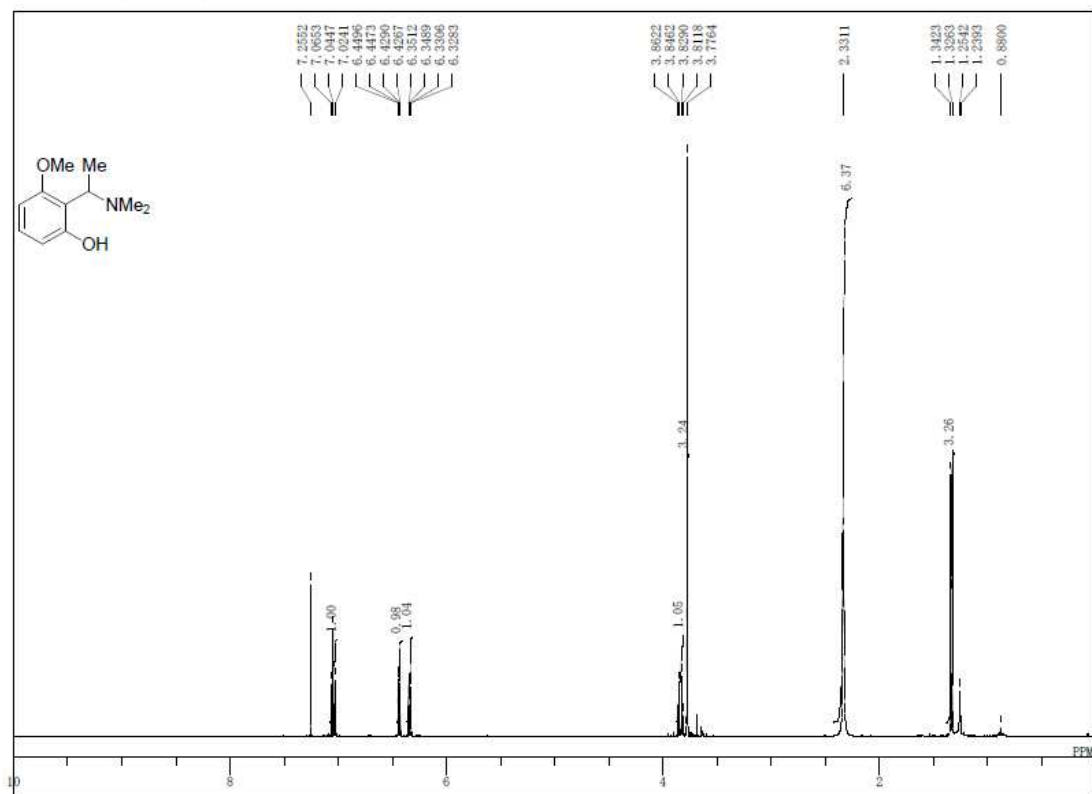

$^{13}\text{C}$  NMR ( $\text{CDCl}_3$ ) of **5b**

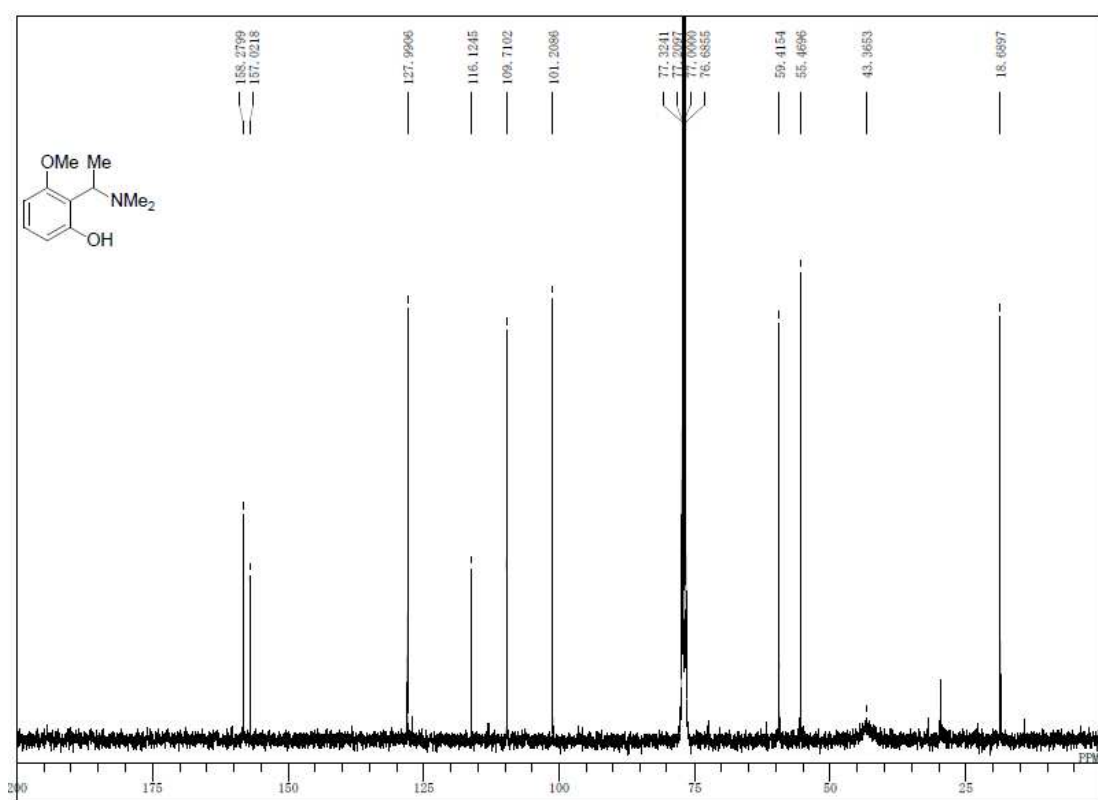



$^1\text{H}$  NMR ( $\text{CDCl}_3$ ) of **5c**

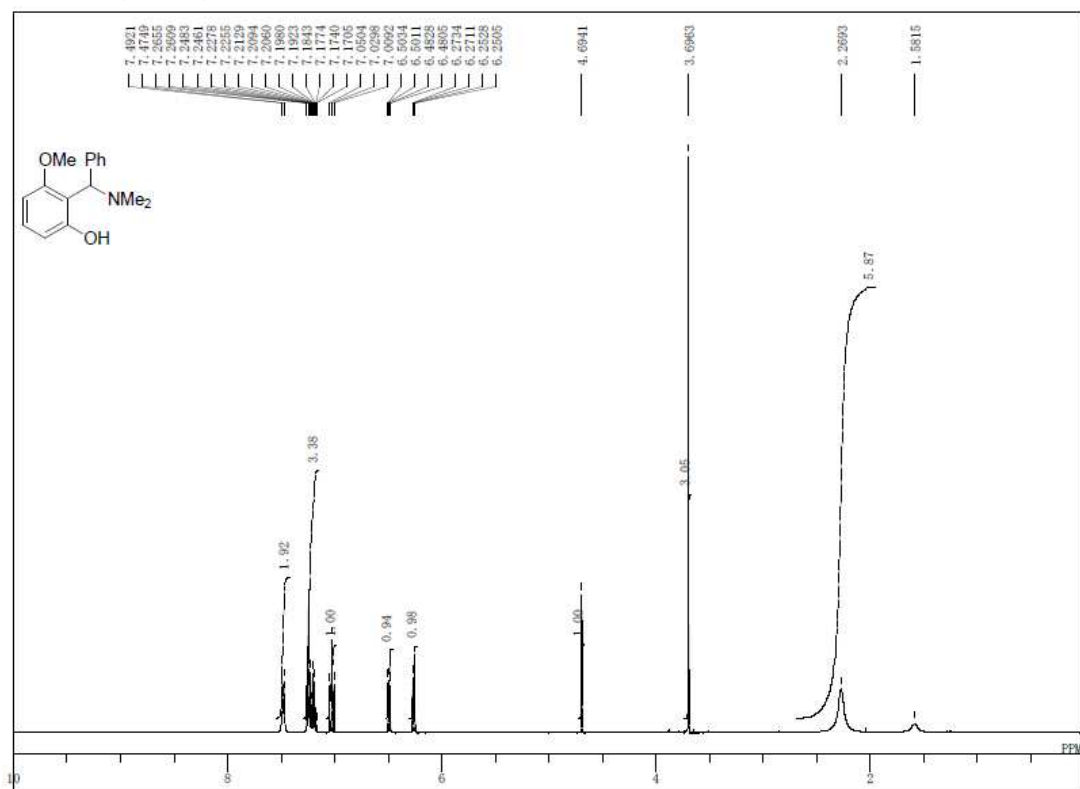

$^{13}\text{C}$  NMR ( $\text{CDCl}_3$ ) of **5c**

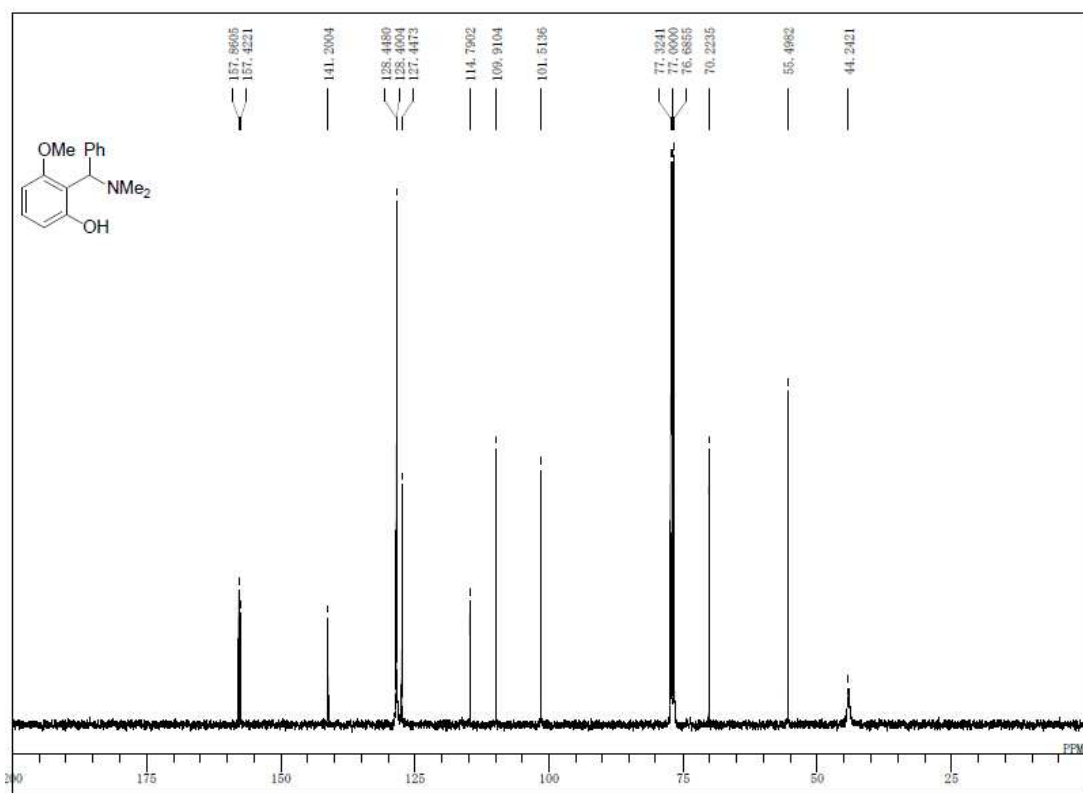

$^1\text{H}$  NMR ( $\text{CDCl}_3$ ) of **5a-d**

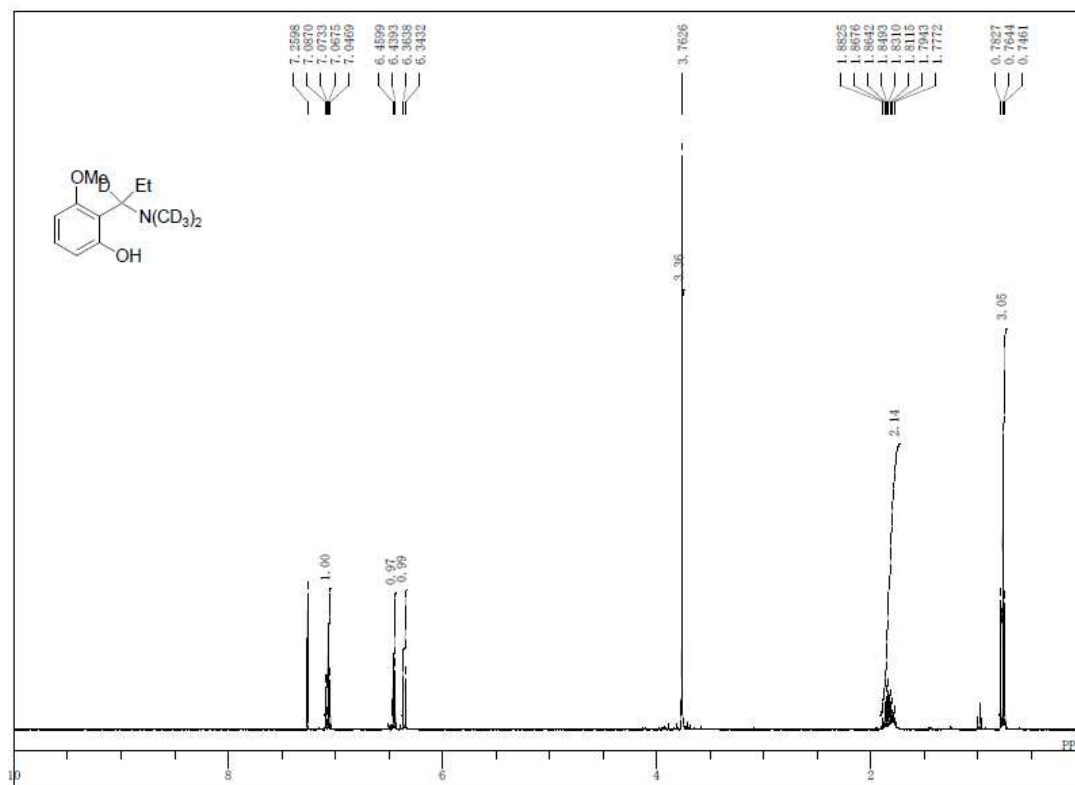

$^{13}\text{C}$  NMR ( $\text{CDCl}_3$ ) of **5a-d**

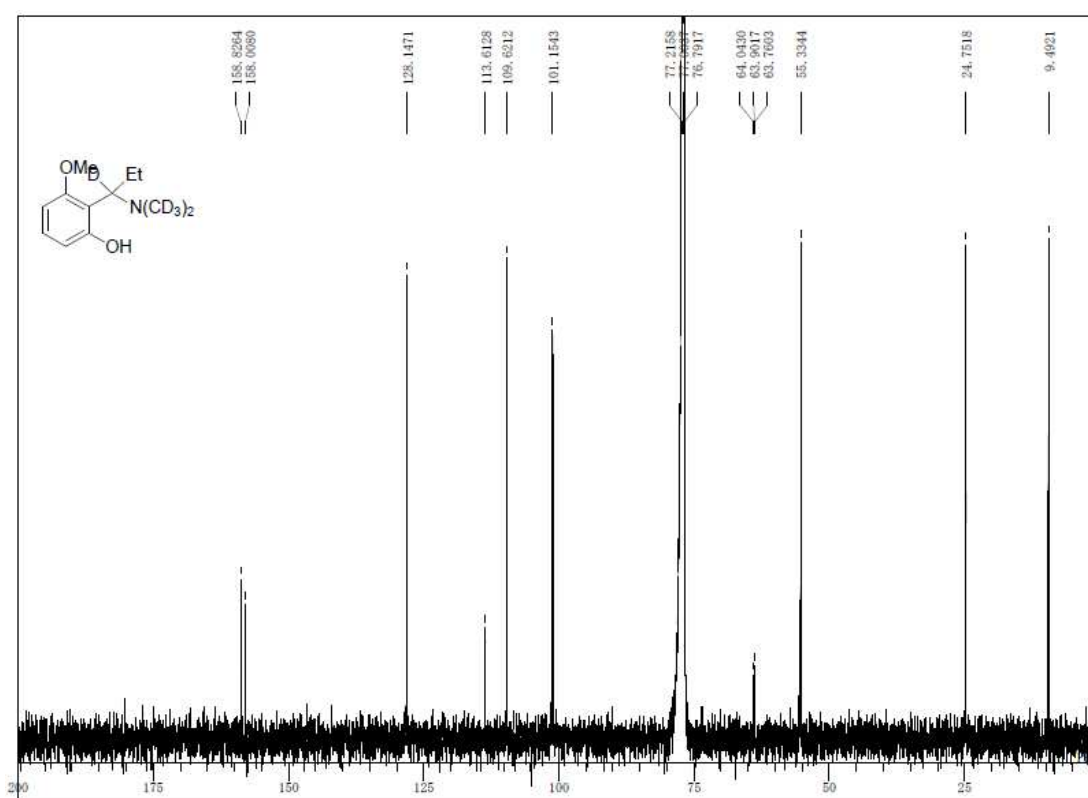

$^1\text{H}$  NMR ( $\text{CD}_3\text{OD}$ ) of **8**

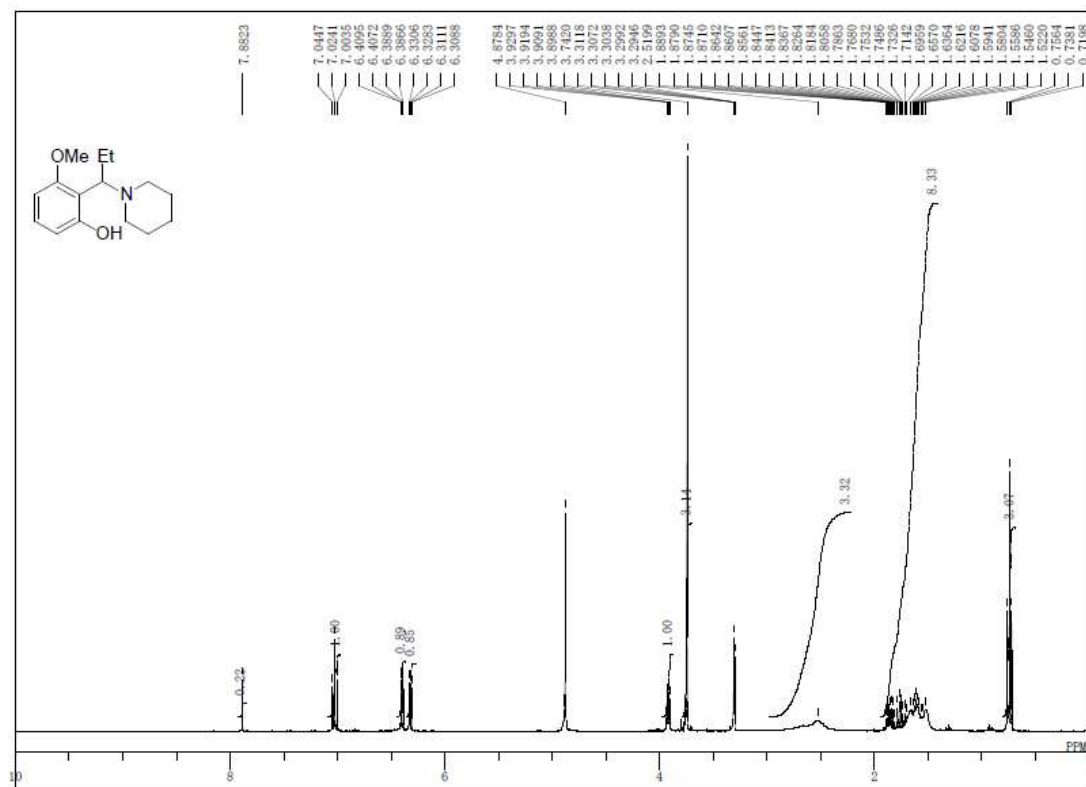

$^{13}\text{C}$  NMR ( $\text{CD}_3\text{OD}$ ) of **8**

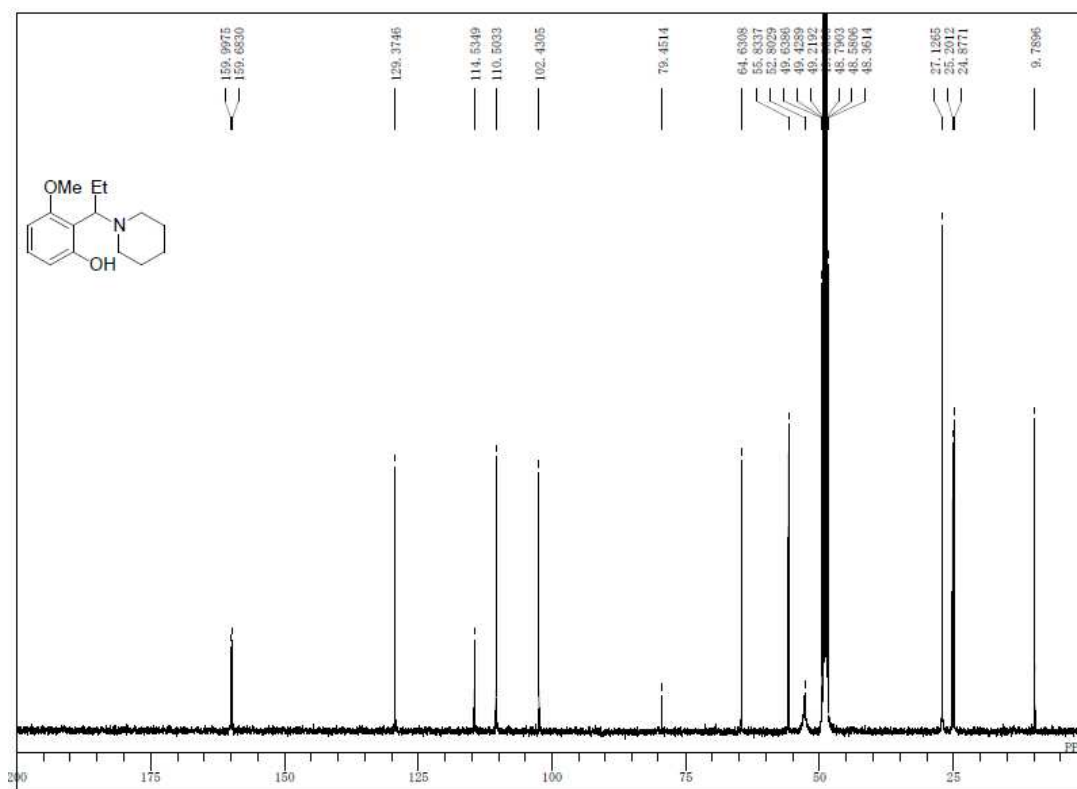

$^1\text{H}$  NMR ( $\text{CDCl}_3$ ) of **10**

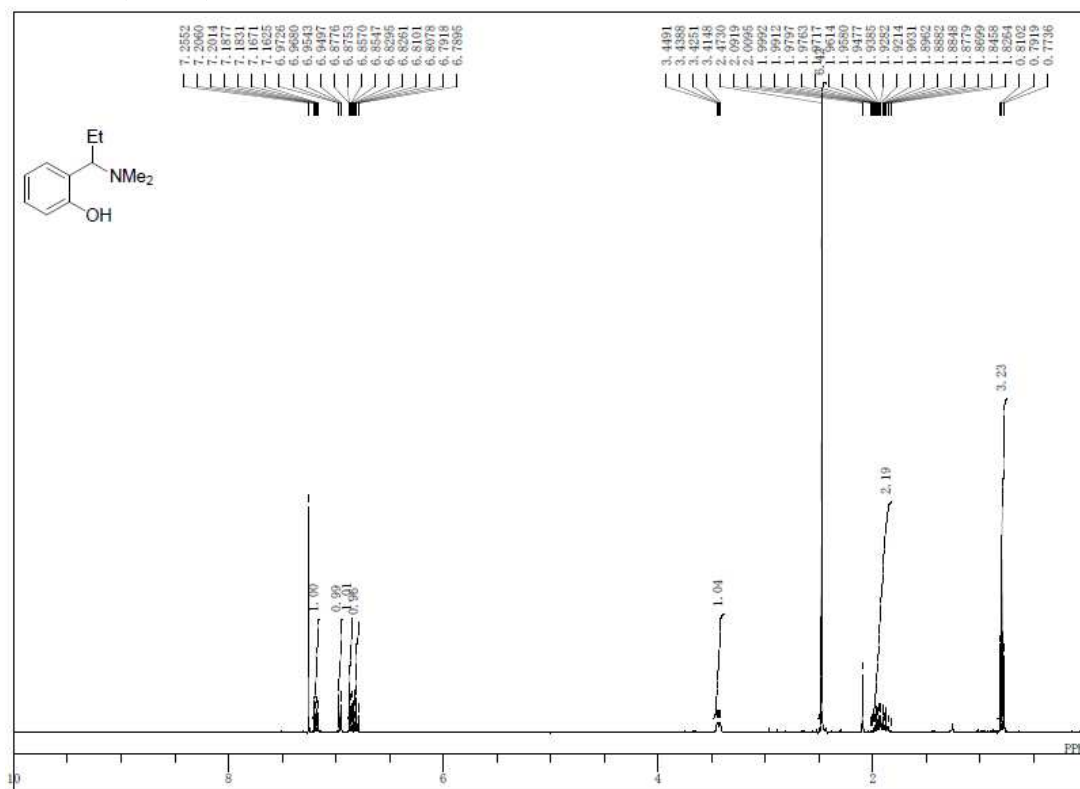

$^{13}\text{C}$  NMR ( $\text{CDCl}_3$ ) of **10**

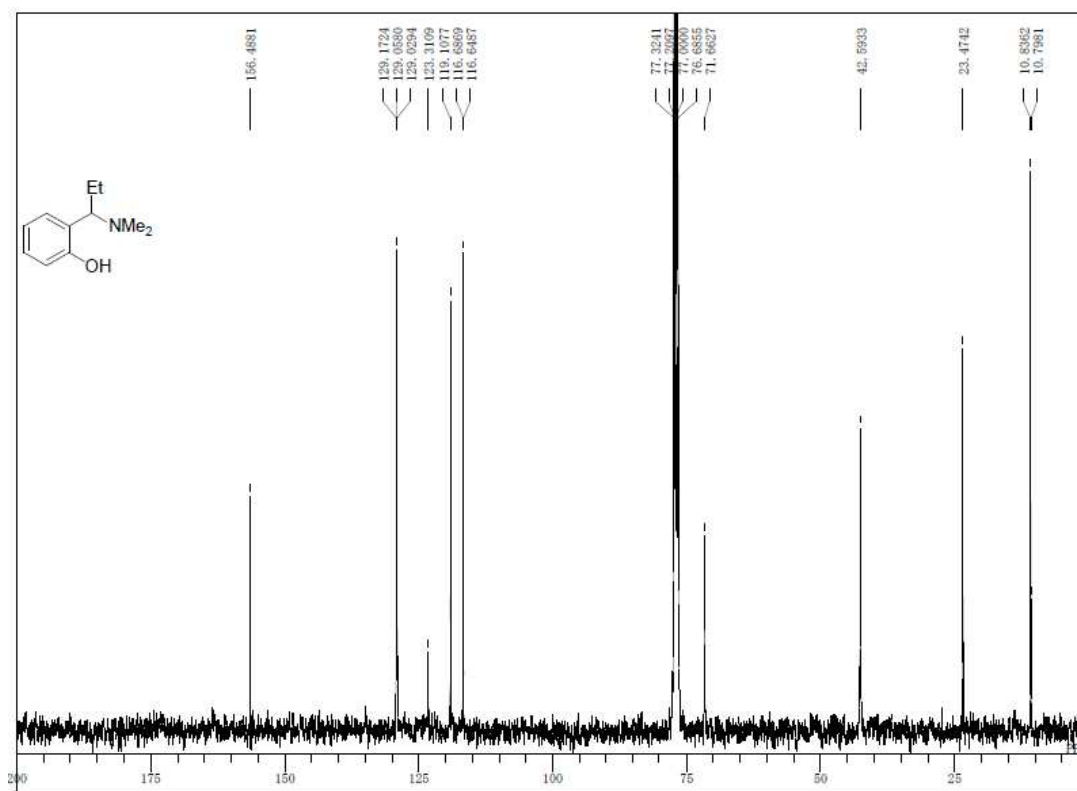

$^1\text{H}$  NMR ( $\text{CDCl}_3$ ) of **12a**

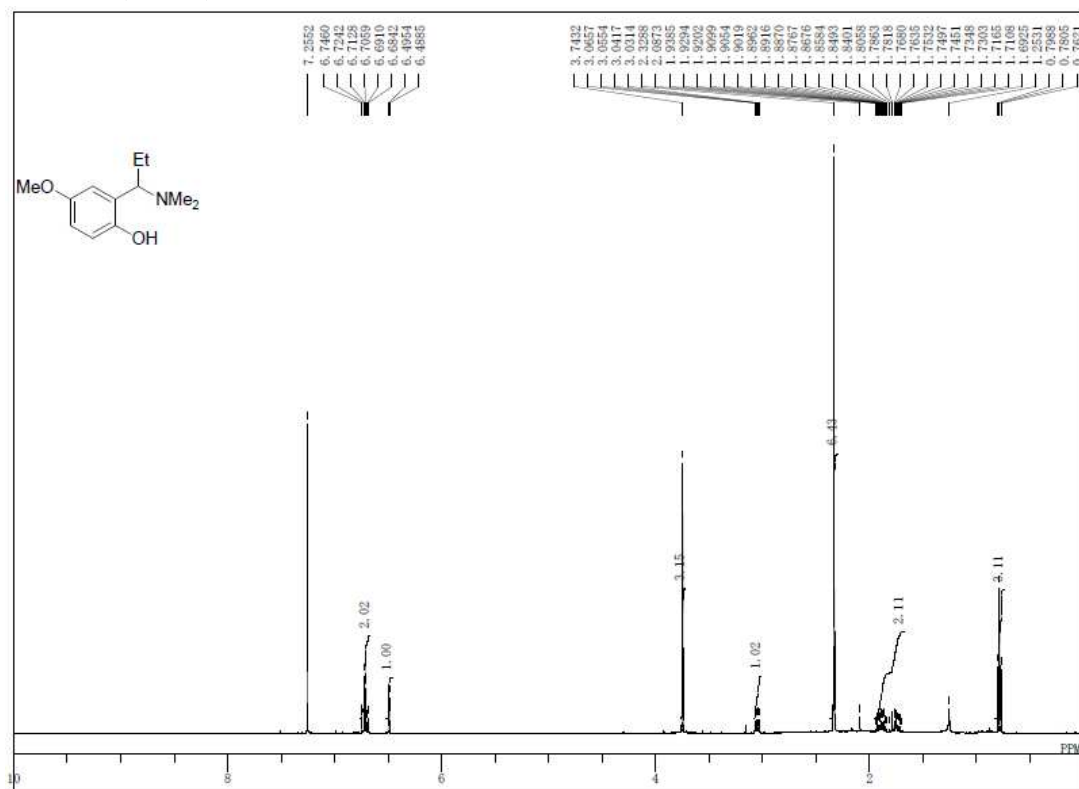

$^{13}\text{C}$  NMR ( $\text{CDCl}_3$ ) of **12a**

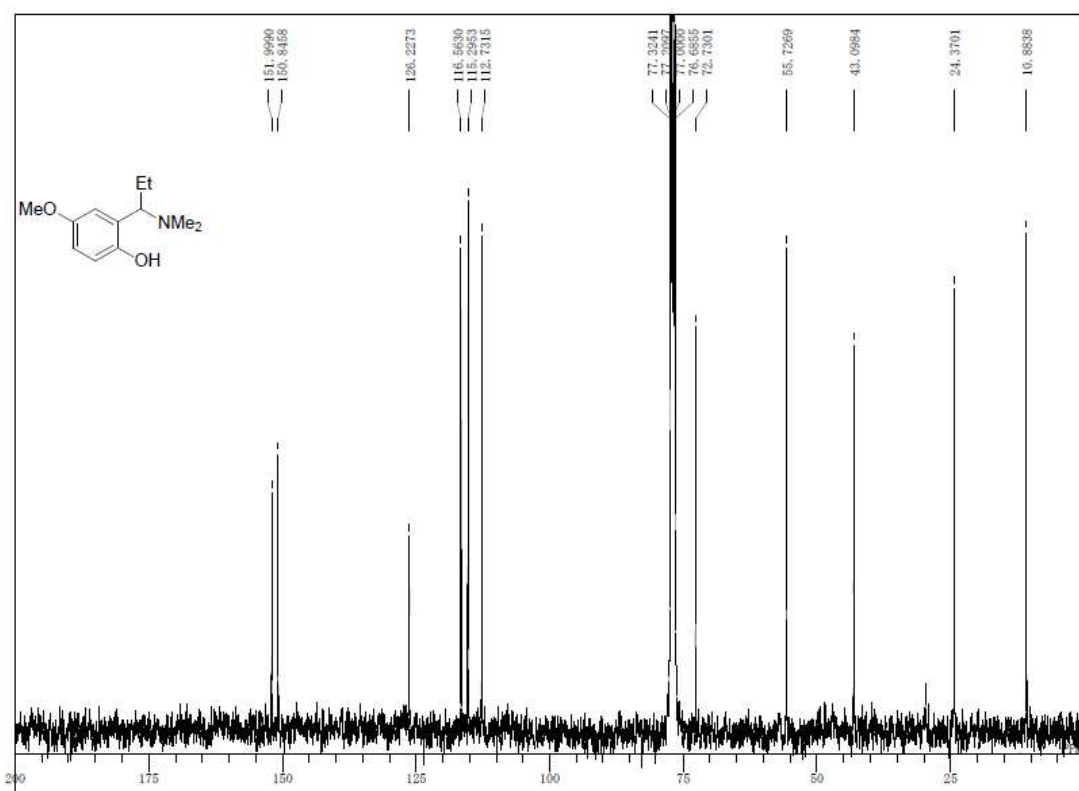

$^1\text{H}$  NMR ( $\text{CDCl}_3$ ) of **12b**

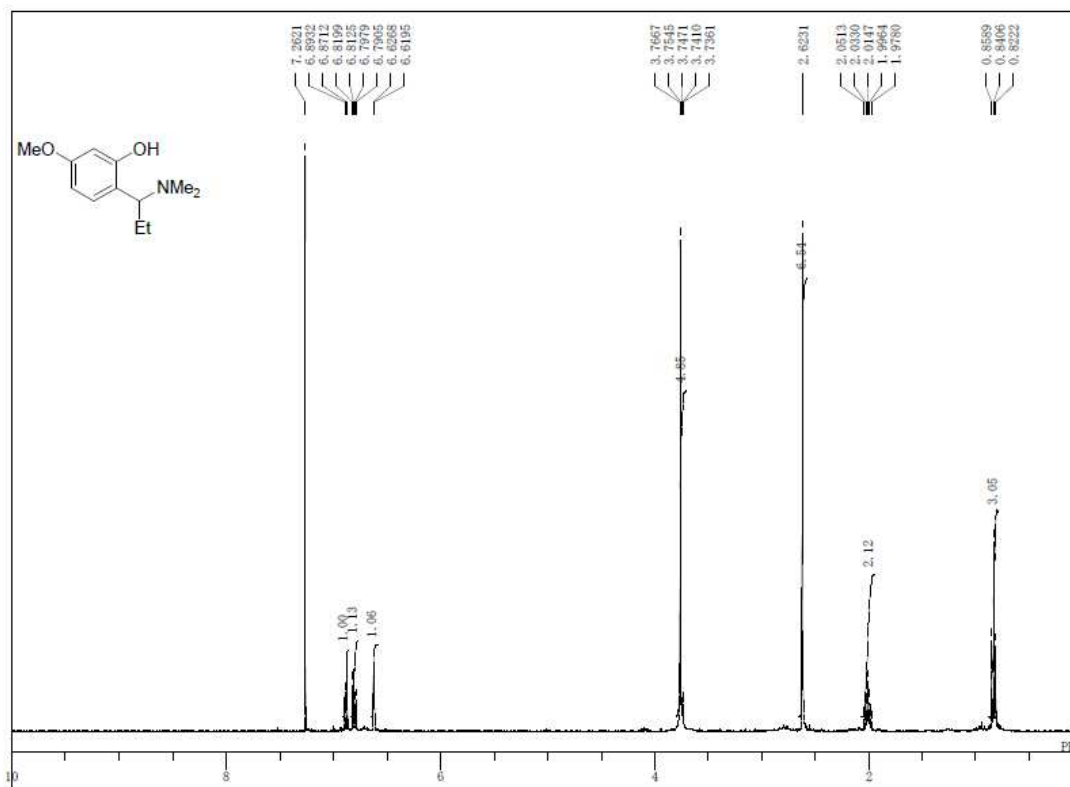

$^{13}\text{C}$  NMR ( $\text{CDCl}_3$ ) of **12b**

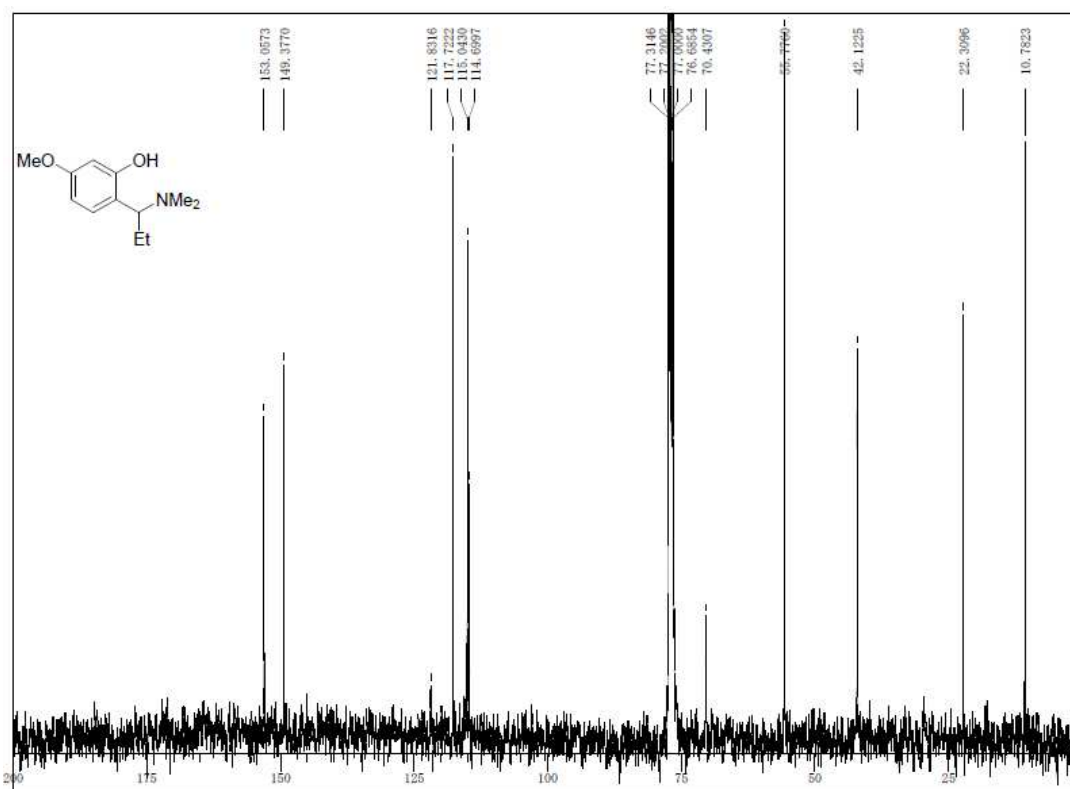

$^1\text{H}$  NMR ( $\text{CDCl}_3$ ) of **14**

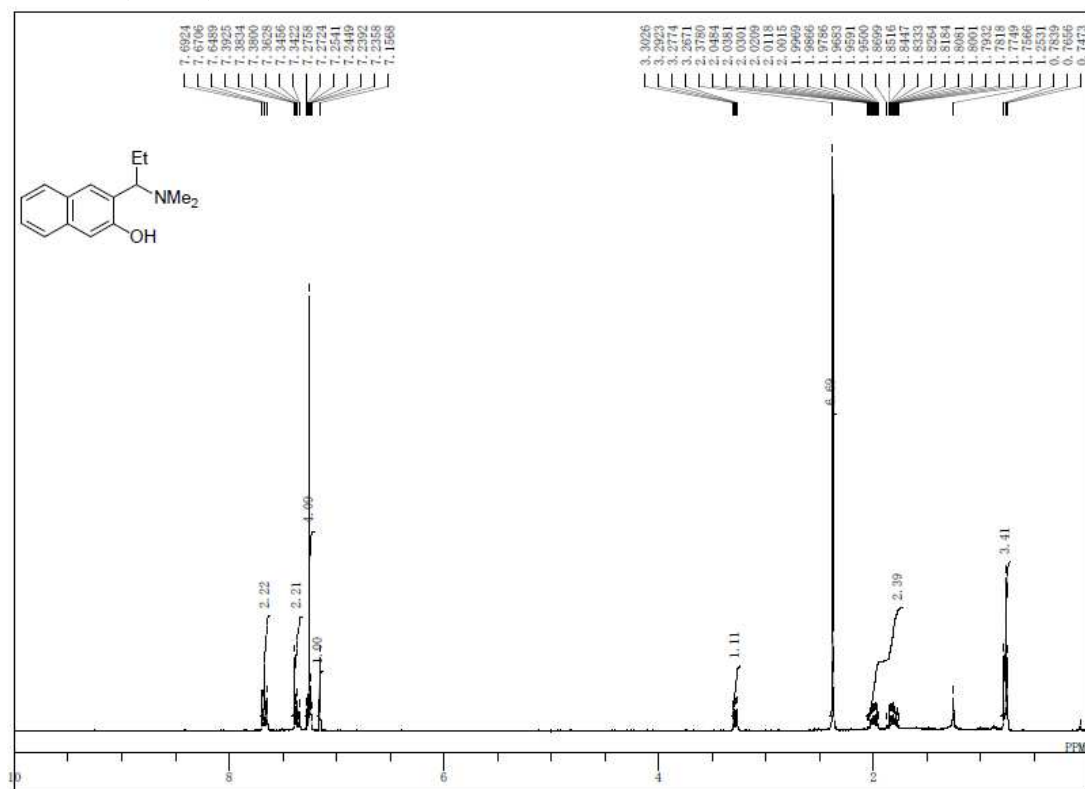

$^{13}\text{C}$  NMR ( $\text{CDCl}_3$ ) of **14**

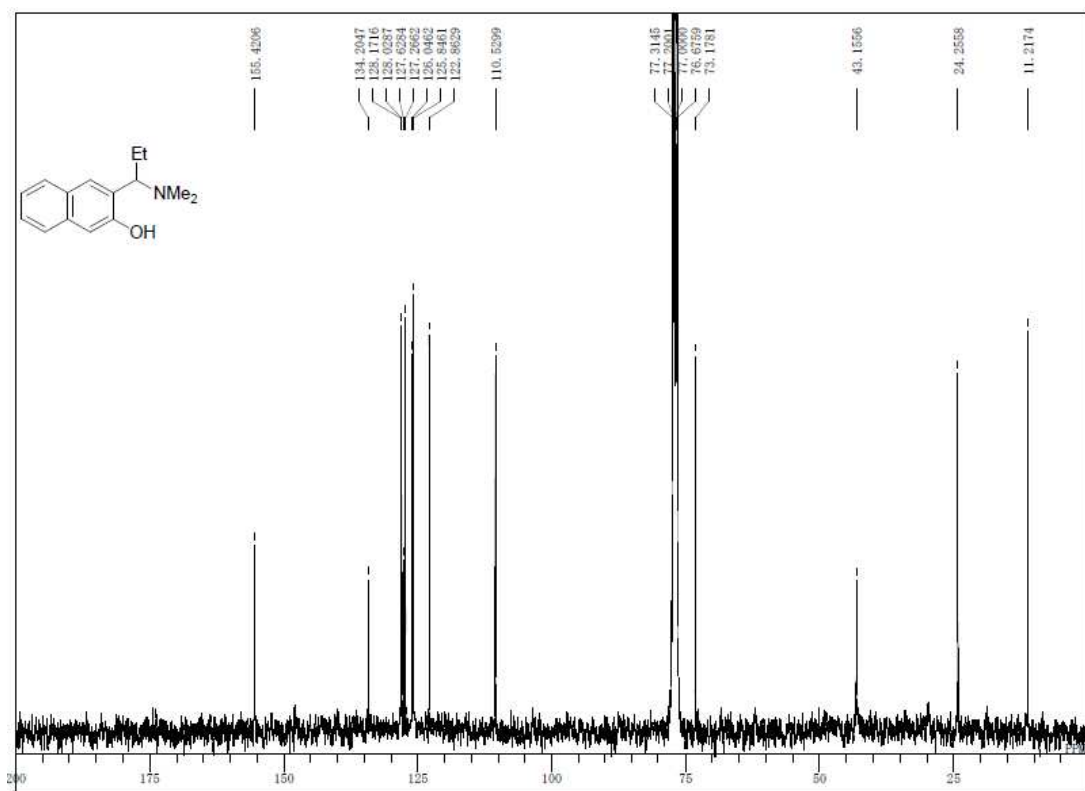

$^1\text{H}$  NMR ( $\text{CDCl}_3$ ) of **15**

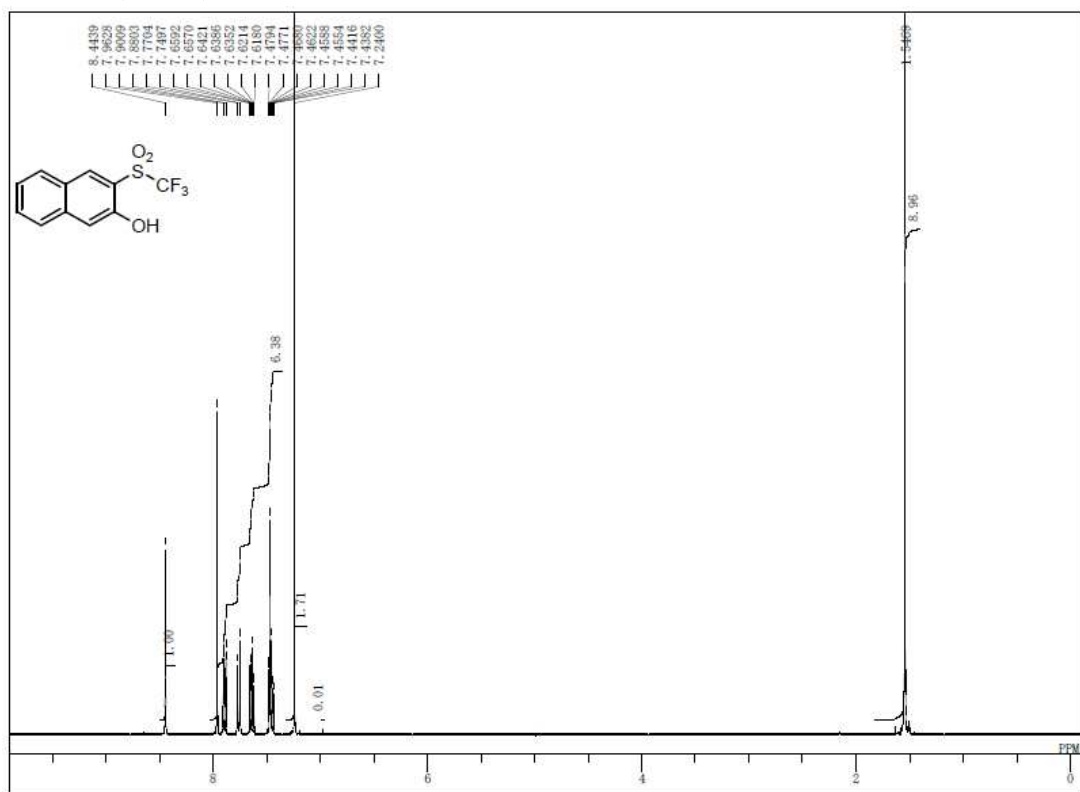

$^1\text{H}$  NMR ( $\text{CDCl}_3$ ) of **15** +  $\text{D}_2\text{O}$

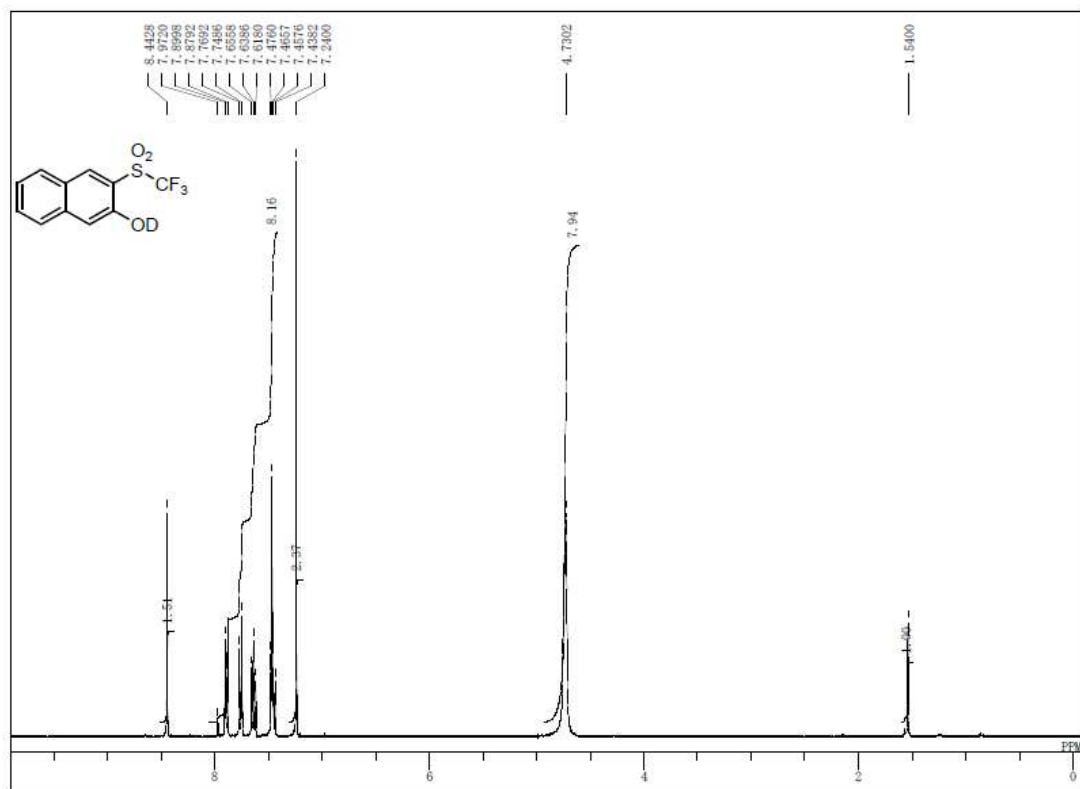



Oc1ccc2cc(OC(F)(F)F)ccc2cc1

151.7988

139.5373  
135.7235  
131.8977  
127.3927  
127.3456  
126.7419  
125.7884  
124.6920  
121.4582  
118.6255  
115.6525  
114.9657  
114.6044

77.3146  
77.0000  
76.6758

PPM

$^1\text{H}$  NMR ( $\text{CDCl}_3$ ) of **16**

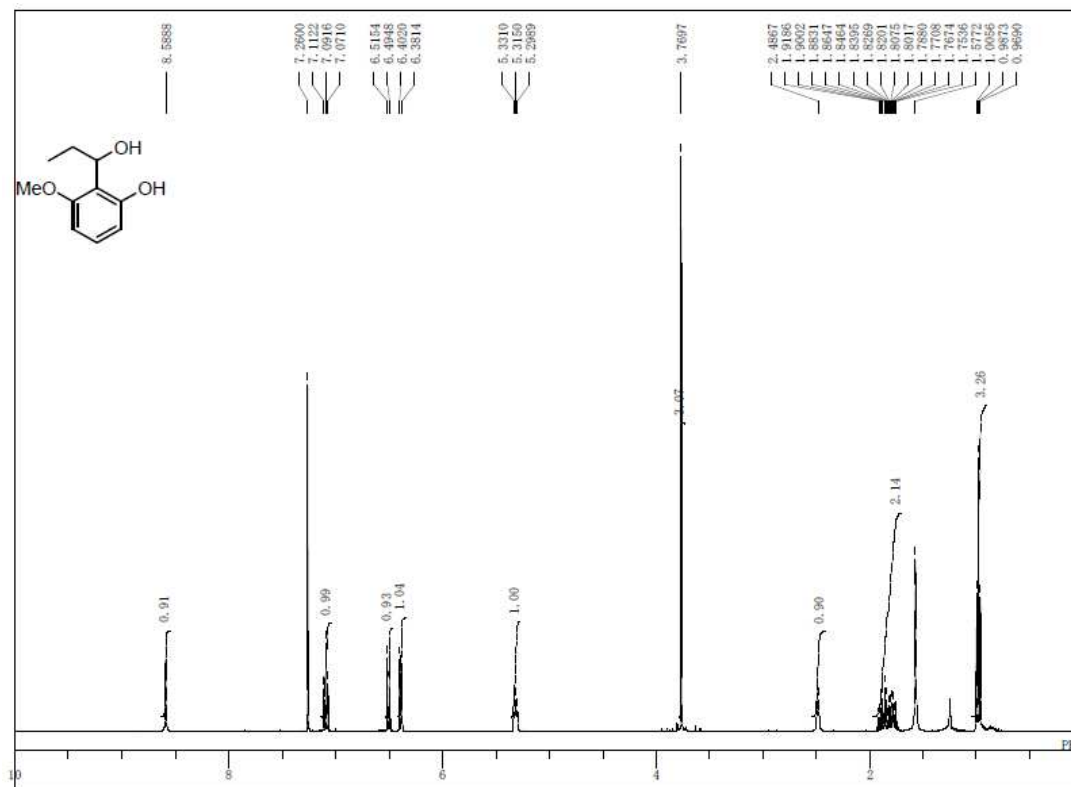

$^{13}\text{C}$  NMR ( $\text{CDCl}_3$ ) of **16**

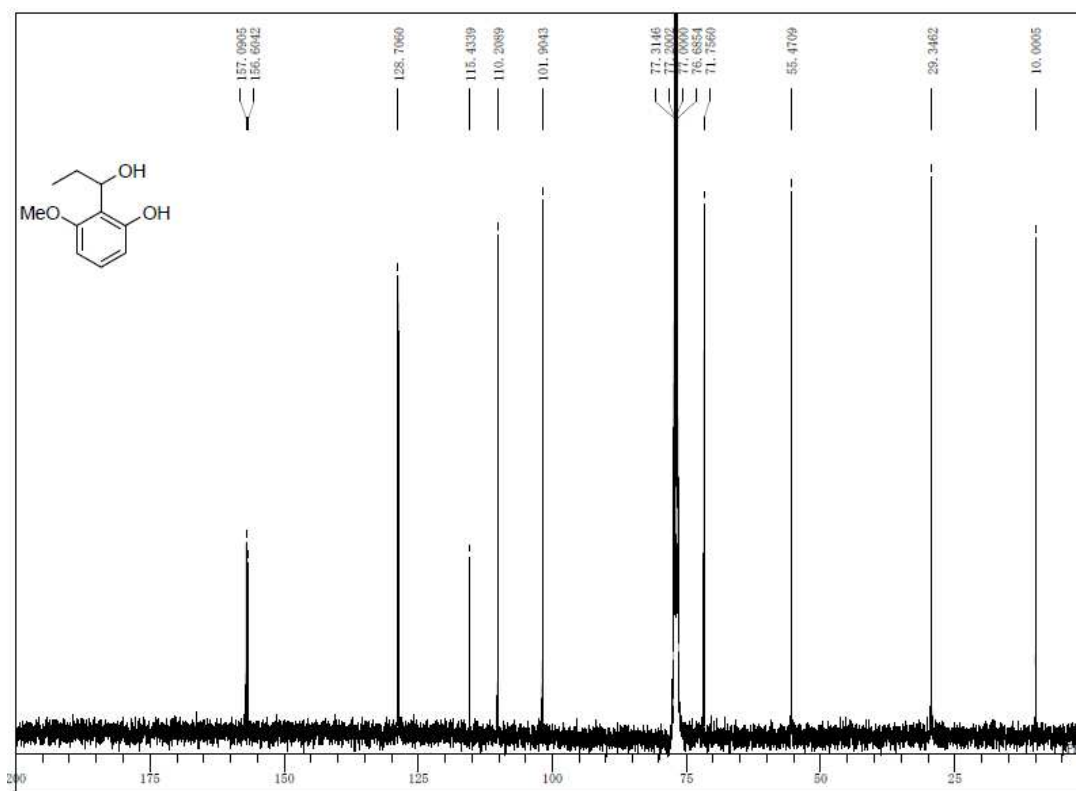

Supplement: Supplementary file 1 [file 4465576]
